# Genome Sequencing and Transcriptome Analysis Reveal Recent Species-specific Gene Duplications in the Plastic Gilthead Sea Bream

Jaume Pérez-Sánchez<sup>1,\*</sup>, Fernando Naya-Català<sup>1</sup>, Beatriz Soriano<sup>2</sup>, M. Carla Piazzon<sup>3</sup>, Ahmed Hafez<sup>2</sup>, Toni Gabaldón<sup>4</sup>, Carlos Llorens<sup>2</sup>, Ariadna Sitjà-Bobadilla<sup>3</sup>, Josep A. Calduch-Giner<sup>1</sup>

<sup>1</sup>Nutrigenomics and Fish Growth Endocrinology Group, Institute of Aquaculture Torre de la Sal (IATS-CSIC), Ribera de Cabanes, Castellón, Spain.

<sup>2</sup>Biotechvana, Parc Científic, Universitat de València, Valencia, Spain.

<sup>3</sup>Fish Pathology Group, Institute of Aquaculture Torre de la Sal (IATS-CSIC), Ribera de Cabanes, Castellón, Spain.

<sup>4</sup>Bioinformatics and Genomics Unit, Centre for Genomic Regulation (CRG), Barcelona Institute of Science and Technology, Barcelona, Spain.

**\*Corresponding author:** Jaume Pérez-Sánchez, e-mail address: [jaime.perez.sanchez@csic.es](mailto:jaime.perez.sanchez@csic.es), telephone number: +34 964319500 (ext. 233).

## Abstract

Gilthead sea bream is an economically important fish species that is remarkably well-adapted to farming and changing environments. Understanding the genomic basis of this plasticity will serve to orientate domestication and selective breeding towards more robust and efficient fish. To address this goal, a draft genome assembly was reconstructed combining short- and long-read high-throughput sequencing with genetic linkage maps. The assembled unmasked genome spans 1.24 Gb of an expected 1.59 Gb genome size with 932 scaffolds (~732 Mb) anchored to 24 chromosomes that are available as a karyotype browser at [www.nutrigroup-iats.org/seabreambrowser](http://www.nutrigroup-iats.org/seabreambrowser). Homology-based functional annotation, supported by RNA-seq transcripts, identified 55,423 actively transcribed genes corresponding to 21,275 unique descriptions with more than 55% of duplicated genes. The mobilome accounts for the 75% of the full genome size and it is mostly constituted by introns (599 Mb), whereas the rest is represented by low complexity repeats, RNA retrotransposons, DNA transposons and non-coding RNAs. This mobilome also contains a large number of chimeric/composite genes (i. e. loci presenting fragments or exons mostly surrounded by LINEs and *Tc1/mariner* DNA transposons), whose analysis revealed an enrichment in immune-related functions and processes. Analysis of synteny and gene phylogenies uncovered a high rate of species-specific duplications, resulting from recent independent duplications rather than from genome polyploidization (2.024 duplications per gene; 0.385 excluding gene expansions). These species-specific duplications were enriched in gene families functionally related to genome transposition, immune response and sensory responses. Additionally, transcriptional analysis of liver, skeletal muscle, intestine, gills and spleen supported a high number of functionally specialized paralogs under tissue-exclusive regulation. Altogether, these findings suggest a role of recent large-scale gene duplications coupled to tissue expression diversification in the evolution of gilthead sea bream genome during its successful adaptation to a changing and pathogen-rich environment. This issue also underscores a role of evolutionary routes

45 for rapid increase of the gene repertoire in teleost fish that are independent of polyploidization.  
46 Since gilthead sea bream has a well-recognized plasticity, the current study will advance our  
47 understanding of fish biology and how organisms of this taxon interact with the environment.

48  
49 **Keywords**

50 Gilthead sea bream, phylogenomics, gene duplications, transposon mobilization, immune  
51 response, response to stimulus, adaptive plasticity.

## 52 Introduction

53 Gilthead sea bream (*Sparus aurata*) is a temperate marine coastal finfish that belongs to the  
54 Sparidae family, order Perciformes. It is an economically important species highly cultured  
55 throughout the Mediterranean area with a yearly production of more than 218,000 metric tonnes,  
56 mostly concentrated in Turkey, Greece, Egypt and Spain (FAO, FishStat database, 2019). This  
57 species occurs naturally in the Mediterranean and the Eastern Atlantic Seas, from the British Isles  
58 and Strait of Gibraltar to Cape Verde and Canary Islands, supporting previous studies of genetic  
59 structure a strong genetic subdivision between Atlantic and Mediterranean populations (Alarcón et  
60 al., 2004; De Inocentiis et al., 2004). Intriguingly, strong subdivisions have also been found at  
61 short distances along the Tunisian coasts (Ben Slimen et al., 2004) or between the French and  
62 Algerian coasts (Chaoui et al., 2009). However, unconstrained gene flow occurs along the coast of  
63 Italy, in the absence of physical and ecological barriers between the Adriatic and Mediterranean  
64 Seas (Franchini et al., 2012).

65 Gilthead sea bream is a protandrous hermaphrodite species, as it matures as male during its  
66 first and second years, but most individuals change to females between their second to fourth year  
67 of life (Zohar et al., 1978). This sexual dimorphism is a fascinating subject in evolutionary  
68 biology, and Pauletto and coworkers (2018) showed for the first time in a hermaphrodite  
69 vertebrate species that the evolutionary pattern of sex-biased genes is highly divergent when  
70 compared to what is observed in gonochoristic species. Adaptation to varying environments,  
71 including high tolerance to changes in water salinity, dissolved oxygen concentration,  
72 temperature, social hierarchy or diet composition are also a characteristic feature of gilthead sea  
73 bream, making this species a rather unique fish with a high plasticity to farming and challenging  
74 environments. This has been assessed in a number of physiological studies with focus on nutrition  
75 (Benedito-Palos et al., 2016; Simó-Mirabet et al., 2018; Gil-Solsona et al., 2019), chronobiology  
76 (Mata-Sotres et al., 2015; Yúfera et al., 2017), feeding behavior (López-Olmeda et al., 2009;

77 Sánchez et al., 2009), stress (Calduch-Giner et al., 2010; Castanheira et al., 2013; Pérez-Sánchez  
78 et al., 2013; Bermejo-Nogales et al., 2014; Magnoni et al., 2017; Martos-Sitcha et al., 2017;  
79 Martos-Sitcha et al., 2019) or disease resilience (Cordero et al., 2016; Estensoro et al., 2016;  
80 Piazzon et al., 2018; Simó-Mirabet et al., 2018). However, the underlying genetic bases of this  
81 adaptive plasticity remain unknown.

82 In addition to the two rounds of whole genome duplication (WGD) that affected bony  
83 vertebrates (Dehal and Boore, 2005), a third event of WGD (3R) occurred in the genome of the  
84 ancestor of teleost fish that is still present in the signature of modern teleost genomes (Jaillon et  
85 al., 2004; Kasahara et al., 2007). More recent WGD events occurred at the common ancestor of  
86 cyprinids and salmonids (Macqueen et al., 2014; Chen et al., 2019). Comparative genomic  
87 analyses have shown that, generally, WGDs are followed by massive and rapid genomic  
88 reorganizations driving the retention of a small proportion of duplicated genes (Langham et al.,  
89 2004). However, recent studies in rainbow trout (*Oncorhynchus mykiss*) reveal that the  
90 rediploidization process can be stepwise and slower than expected (Berthelot et al., 2014). Further  
91 complexity comes from tandemly-arrayed genes that are critical zones of adaptive plasticity,  
92 forming the building blocks for more versatile immune, reproductive and sensory responses in  
93 plants and animals including fish (Rizzon et al., 2006; Kliebesntein 2008; van der Aa et al., 2009;  
94 Lu et al., 2012). In any case, it has been shown that retained genes following WGDs or small scale  
95 duplicates are preferentially associated with species-specific adaptive traits (Maere et al., 2005).  
96 This notion is reinforced by the recently published study of large-scale ruminant genome  
97 comparisons (Chen et al., 2019), also evidenced in the case of modern teleosts and primitive eels  
98 (Chen et al., 2008; Tine et al., 2014; Rozenfeld et al., 2019) for their improved adjustment to  
99 natural environment.

100 Here we produced a high quality draft sequence of the gilthead sea bream genome by  
101 combining high-throughput sequencing with genetic linkage maps. The current draft assembly

102 spans ~1.24 Gb with 932 scaffolds ordered and oriented along 24 chromosomes derived from the  
103 genetic linkage map of the first gilthead sea bream genome release (Pauletto et al., 2018).  
104 Homology-based functional annotation, supported by RNA-seq transcripts, identified 55,423  
105 actively transcribed genes corresponding to 21,275 unique descriptions. Synteny and  
106 phylogenomic analyses revealed a high frequency of species-specific duplications, mostly  
107 resulting in the enrichment of biological processes related to genome transposition but also to  
108 immune response and sensory responses. Since divergent regulation and function of the multiple  
109 copies of tissue-exclusive genes is also supported by RNA-seq transcriptional analysis, gilthead  
110 sea bream is emerging as an interesting model to assess the teleost genome expansion and its  
111 contribution to adaptive plasticity in a challenging environment.

## 112

### 113 **Material and methods**

#### 114 **Ethics Approval**

115 Procedures for fish manipulation and tissue collection were approved by the Ethics and Animal  
116 Welfare Committee of Institute of Aquaculture Torre de la Sal and carried out according to the  
117 National (Royal Decree RD53/2013) and the current EU legislation (2010/63/EU) on the handling  
118 of experimental fish.

#### 119

#### 120 **Fish and Tissue Processing**

121 Fish were reared from early life stages under natural conditions of photoperiod and temperature at  
122 the experimental facilities of IATS (40°5N; 0°10E). Blood of one single male was obtained from  
123 caudal vessels using heparinized syringes, and DNA from total blood cells was extracted with a  
124 commercial kit (RealPure Spin Blood Kit, Durviz, Valencia, Spain). Quality and quantity of  
125 genomic DNA was assessed by means of PicoGreen quantification and gel electrophoresis. An  
126 aliquot of 5 µg DNA was mechanically sheared with a bath sonicator (Diagenode BioRuptor,

127 Diagenode, Liège, Belgium) and low molecular weight fragments were used for the preparation of  
128 DNA libraries.

129 Total RNA (70-100 µg) from white skeletal muscle (6 individual fish) and pooled samples  
130 of anterior and posterior intestine sections were extracted with the MagMAX™-96 Total RNA  
131 Isolation Kit (Applied Biosystems, Foster City, CA, USA). The RNA concentration and purity  
132 was determined using a Nanodrop 2000c (Thermo Scientific, Wilmington, DE, USA). Quality and  
133 integrity of the isolated RNA were checked on an Agilent Bioanalyzer 2100 total RNA Nano  
134 series II chip (Agilent, Amstelveen, Netherlands), yielding RNA integrity numbers (RIN) between  
135 8 and 10.

### 136 137 **DNA/RNA Sequencing**

138 Genomic DNA material was used for the preparation of two standard TrueSeq Illumina libraries  
139 (Illumina Inc) with an average size of 360 and 747 bp, respectively. Illumina NextSeq500 system  
140 under a 2×150 paired-end (PE) format was used as sequencing platform to generate approximately  
141 600 million reads. Additionally, two different strategies were implemented in order to help in  
142 genome scaffolding: 1) Nextera Mate-Pair Preparation Kit (Illumina Inc) was used to make two  
143 mate pairs (MP) libraries (average insert sizes were 5 and 8 kb) using the Illumina NextSeq500  
144 platform to a depth of 11 Gb (2×75 MP format) and 2) genomic DNA was submitted to Macrogen  
145 (Seoul, South Korea) for the construction of 12 single molecule real time (SMRT) cell libraries  
146 (insert size up to 50 kb) using PacBio RS II (Pacific Biosciences) as sequencing system.  
147 Additionally, eight RNA-seq libraries (for more details, see Data Availability) were constructed  
148 by means of Illumina TrueSeq RNA-seq preparation protocol (non-directional method).  
149 Sequencing of indexed libraries was performed on the Illumina HiSeq v3, resulting in  
150 approximately 11-17 million reads per sample (1×75 nt single reads) from skeletal muscle samples  
151 and 22-27 million read pairs (2×150 nt paired reads) from intestine samples.

152

## 153 ***De novo* Genome Assembly and Chromosome Anchoring**

154 The SMRT cell libraries were pre-processed using the trimming of the CANU assembler (Koren et  
155 al., 2017). Illumina PE libraries were checked for quality analysis using FASTQC 0.11.7,  
156 available at (<http://www.bioinformatics.bbsrc.ac.uk/projects/fastqc/>), and then pre-processed using  
157 Cutadapt v1.16 (Martin, 2011) and Prinseq 0.20.4 (Schmieder and Edwards, 2011). Quality  
158 analysis and pre-processing of Illumina MP libraries was performed with FastQC and Platanus  
159 (Kajitani et al., 2014). These protocols for pre-processing *de novo* assembly were executed using  
160 the DeNovoSeq pipeline provided by the GPRO suite (Futami et al., 2011). Jellyfish (Marçais and  
161 Kingsford, 2011) was used to estimate the genome size calculating the count distribution of k-  
162 mers in the set of Illumina PE libraries. The estimated coverage was inferred using Bowtie2  
163 v2.3.4.1 (Langmead et al., 2009). Illumina PE and MP libraries were introduced in the 127mer  
164 version of the assembler SOAP de Novo2 v2.04-r241 (Luo et al., 2012) for the assembly of  
165 gilthead sea bream genome. In order to test different k-mer values, different assemblies were  
166 performed and a k-mer length of 63 bp (k63) was considered the best in terms of metrics. To  
167 improve the consensus sequence and to close gaps, two rounds of the following combined strategy  
168 were conducted: 1) elimination of duplicates with Dedupe of BBTools ([http://jgi.doe.gov/data-  
169 and-tools/bbtools/](http://jgi.doe.gov/data-and-tools/bbtools/)), 2) gap filling using PacBio corrected reads with PBJelly (English et al., 2012),  
170 3) gap filling using PE and MP libraries with Soap *de novo* Gap Closer, 4) hybrid re-scaffolding  
171 using corrected SMRT reads together with Illumina PE and MP reads with Opera 2.0.6 (Gao et al.,  
172 2011) and 5) transcriptome-guided re-scaffolding using as reference the gilthead sea bream  
173 transcriptome (Calduch-Giner et al., 2013) with L RNA scaffolder (Xue et al., 2013). A step of  
174 genome masking was not considered in order to achieve a more reliable genome draft.

175 Highly conserved non-coding elements (CNEs) present in 3 hermaphrodite genomes (*S.*  
176 *aurata*, *Lates calcarifer*, *Monopterus albus*) were released by Pauletto et al., (2018), and the



177 super-scaffold coordinates related to these CNEs (200-800 bp interval length) were then retrieved.  
178 Sequences were aligned against our assembly for increasing the super-scaffolding by means of the  
179 BLAST package. A genome browser was built for the navigation and blast-query of the assembled  
180 sequences and associated annotations using Javascript-based tool JBrowse (Skinner et al., 2009).  
181 The genome browser, available online at <http://nutrigrp-iats.org/seabreambrowser>, provides two  
182 modes of navigation for the assembly scaffolds and the entire set of super-scaffolds anchored from  
183 CNEs.

## 184

### 185 **Genome Annotation**

186 Prediction of coding genes was carried out using the software AUGUSTUS 3.3 in a two-step  
187 process. An initial round of prediction was conducted, and gene model parameters were trained  
188 from a set of 13 fish species (*Astyanax mexicanus*, *Danio rerio*, *Gadus morhua*, *Gasterosteus*  
189 *aculeatus*, *Latimeria chalumnae*, *Lepisosteus oculatus*, *Oreochromis niloticus*, *Oryzias latipes*,  
190 *Petromyzon marinus*, *Poecilia formosa*, *Takifugu rubripes*, *Tetraodon nigroviridis* and  
191 *Xiphophorus maculatus*) available in the Ensembl database release 87 (Cunningham et al., 2015).  
192 Then, the merged prediction of gilthead sea bream genes was translated to peptides using  
193 OrfPredictor script (Min et al., 2013), and it was used by Scipio 1.4 (Keller et al., 2008) to  
194 generate a new training set for a second round of gene predictions. This second round included  
195 sequences from the published gilthead sea bream transcriptome (Calduch-Giner et al., 2013) and  
196 RNA-seq data from muscle and intestine in addition to those of liver, gills and spleen, retrieved  
197 from the SRA archive (see Data Availability) (Piazzon et al., 2019) as AUGUSTUS hints. The  
198 script autoAugTrain.pl of AUGUSTUS was used to determine the precise exon/intron gene  
199 structures. The Gffread software (Trapnell et al., 2012) rendered the final set of coding sequences  
200 (CDS), using the genome transcript file generated by AUGUSTUS. BLAST package was used for  
201 gene annotation, performing BLASTX searches against SWISSPROT, NR and the IATS-CSIC

202 gilthead sea bream transcriptome databases with an E-value cutoff of  $10^{-5}$  using the DeNovoSeq  
203 pipeline provided by the GPRO suite. Redundancy analysis were performed in order to detect  
204 segmental duplications (i.e. predicted genes that occur at more than one site within the genome  
205 and typically share >90% of sequence identity) within the final set of transcripts retrieved from  
206 RNA-seq libraries using Dedupe of BBTools (<http://jgi.doe.gov/data-and-tools/bbtools/>). Identity  
207 thresholds in redundancy analysis were fixed at 90%, 95% and 98%.

208 The mobilome draft was annotated considering the following mobile genetic elements  
209 (MGEs): non-coding RNA genes, introns, low complexity repeats, Class I retrotransposons, Class  
210 II DNA transposons and Chimeric/Composite genes. Introns were retrieved from the *ab initio*  
211 predictions. To annotate non-coding RNAs (ncRNAs), a non-redundant database of both small and  
212 long ncRNAs was constructed based on the ncRNAs annotations of fish genomes used for *de novo*  
213 gene prediction (Maere et al., 2005). An additional fish tRNA database was created using the  
214 tRNAs from *D. rerio*, *G. aculeatus*, *O. latipes*, *P. marinus*, *T. rubripes* and *T. nigroviridis* from  
215 UCSC (<http://gtrnadb2009.ucsc.edu>). Then, a BLAT search (Kent, 2002) served to annotate  
216 ncRNAs in the gilthead sea bream genome. Duplicated BLAT outputs were removed using  
217 Bedtools (<http://bedtools.readthedocs.io>). A final step of curation was performed based on the  
218 merging of entries that in the same scaffold had: 1) the same parent and were consecutive in 5-10  
219 nucleotides, 2) the same target and initial position), 3) the same biotype and overlapped and 4) the  
220 support of real transcripts from the gilthead sea bream transcriptome. After curation, repeat  
221 sequences retained into longer ones were discarded. To annotate the remaining MGEs,  
222 RepeatModeler 1.0.11 ([www.repeatmasker.org](http://www.repeatmasker.org)) was used for the *de novo* repeat family  
223 identification. RepeatMasker 4.0.7 and NCBI-BLAST alignments (E-value threshold  $< 10^{-5}$ )  
224 (Altschul et al., 1990) were used to identify simple repeats, low complexity repeats and  
225 interspersed repeats within the gilthead sea bream genome. Repbase 22.09 (Bao et al., 2015),  
226 GyDB (Llorens et al., 2011) and *de novo* repeat families coming from RepeatModeler were used

227 as libraries. LTR finder (Xu and Wang, 2007) and Einverted of EMBOSS (Rice et al., 2000) were  
228 used to characterize long terminal repeats (LTRs) and inverted repeats, respectively.

229 All the annotations corresponding to coding genes associated to MGEs  
230 (chimeric/composite genes) were extracted from the previously presented annotation of coding  
231 gene and were used as queries in a BLAST search against Repbase 22.09 and GyDB databases.  
232 All the results were curated by means of merging overlapping features with the same annotation or  
233 separated by less than 100 nucleotides.

### 234 235 **Gene Synteny and Phylogenomics**

236 Synteny detection was performed across the genome of gilthead sea bream over other 9 fish  
237 species (*Cynoglossus semilaevis*, *D. rerio*, *G. aculeatus*, *Maylandia zebra*, *O. mykiss*, *O. niloticus*,  
238 *O. latipes*, *Salmo salar* and *Xiphophorus maculatus*). The algorithm includes the following steps:  
239 1) selection of single-copy genes present in only one scaffold in the gilthead sea bream assembly,  
240 2) alignment of gilthead sea bream genes against the other species with BLASTX of the NCBI-  
241 BLAST package with more than 70% of sequence identity and coverage, and 3) synteny file  
242 construction, establishing an E-value  $< 10^{-5}$  to consider a gilthead sea bream-species gene  
243 correspondence (with number of gaps  $< 25$ ). A syntenic block must contain a minimum of 5 genes  
244 to be included in the results. Circular genome representations were created using Circos  
245 (Krzywinski et al., 2009).

246 The gilthead sea bream phylome was reconstructed using phylomeDB pipeline (Huerta-  
247 Cepas et al., 2014). For each protein-coding gene in gilthead sea bream, a Smith-Waterman search  
248 was performed against the proteome database of 19 selected species (*Latimeria chalumnae*, *L.*  
249 *oculatus*, *D. rerio*, *A. mexicanus*, *P. formosa*, *G. morhua*, *O. mykiss*, *Scophthalmus maximus*, *O.*  
250 *latipes*, *O. niloticus*, *T. rubripes*, *G. aculeatus*, *T. nigroviridis*, *Petromyzon marinus*,  
251 *Callorhinchus milii*, *Xenopus laevis*, *Mus musculus* and *Anolis carolinensis*). Multiple alignments

252 of homologous sequences (E-value  $< 10^{-5}$  and 50% overlap over query sequence) were built in  
253 forward and reverse sense with three sequence alignment programs: MUSCLE (Edgar, 2004),  
254 MAFFT (Kato et al., 2005) and KALIGN (Lassman and Sonnhammer, 2005). The six resulting  
255 alignments were then combined in a consistency framework as implemented in M-COFFEE  
256 (Wallace et al., 2006), and the resulting alignment was trimmed with trimAl (consistency cut-off  
257 of 0.16667 and  $-gt > 0.1$ ) (Cappella-Gutiérrez et al., 2009). Multiple trees were then built, and the  
258 programming toolkit ETE (Huerta-Cepas et al., 2010) was used for each tree to understand  
259 duplication and speciation relationships by means of a 0-score species overlap approach. All  
260 information about orthology and paralogy relationships is available in phylomeDB (Huerta-Cepas  
261 et al., 2014). Gene duplication in the gilthead sea bream lineage was analyzed to detect genes that  
262 had undergone duplications through the evolution in different lineages (Huerta-Cepas and  
263 Gabaldon, 2011). PhyML v3 (Guindon et al., 2010) was used to create a maximum likelihood tree  
264 with one-to-one orthologous in each of the selected species. Branch support was analyzed using a  
265 parametric approximate likelihood ratio test (aLRT) based on a chi-square distribution with three  
266 rates categories in all the cases. A super-tree from all single gene trees in the gilthead sea bream  
267 phylome was also reconstructed using a gene tree parsimony strategy as implemented in duptree  
268 (Wehe et al., 2008).

## 269 **Functional Gene Enrichment Analysis**

271 A functional analysis of gene ontology (GO) terms and metabolic pathways was performed over  
272 the protein coding genes (PCG) model. Cellular Component, Molecular Function and Biological  
273 Process GO terms were obtained from this functional analysis and a threshold of 50 counts was  
274 used to achieve the most representative GO terms for each category. Fisher test-based functional  
275 enrichment of biological process-associated GO terms was computed by analysing the fraction of  
276 the model corresponding to chimeric/composite genes. Enrichment analysis derived from

277 phylogenomics was also performed using FatiGO (Al-Sharour et al., 2007) by comparing ontology  
278 annotations of the proteins involved in duplication against all the others encoded in the genome.

## 279 280 **Gene Duplication Landscape and Tissue Gene Expression**

281 RNA-seq sequenced reads were processed to generate a gene expression Atlas across tissues.  
282 Briefly, reads were independently mapped against the reference transcriptome created from the set  
283 of *ab initio* predictions using Bowtie2. As a highly conservative procedure, only predictions with  
284 > 50% homology overlapping and  $\geq 5$  counts were accepted and included as reliable features.  
285 Corset v1.07 (Davidson and Oshlack, 2014) was used to quantify genes in each sample separately.  
286 Expression values were calculated in reads per kilobase per million mapped reads (RPKM)  
287 (Mortazavi et al., 2008).

288 To retrieve and annotate duplication events, we considered both the species-specific set of  
289 homologous genes from the phylogenomics analysis as well as *ab initio* predictions supported by  
290 RNA-seq transcripts. To consider a tissue-specific set of paralogs, all the copies must be supported  
291 by phylogenomic evidence and showing the same molecular description based on sequence  
292 similarity. Furthermore, to consider a tissue-exclusive set of paralogs, all the copies must also  
293 show an expression value in only one of the analyzed tissues. A statistical t-test and a one-way  
294 ANOVA ( $P < 0.05$ ) test were used to detect the differential expression between specialized  
295 gilthead sea bream paralogs of skeletal muscle, liver, gills and spleen. Correction by False  
296 Discovery Rate (FDR) ( $\alpha = 0.05$ ) was applied for all the paralog sets. This statistical analysis was  
297 not applied to intestine samples because the expression analysis was conducted with pooled  
298 instead of individual samples.

299 The existence of Atlas of expression in humans and other higher vertebrates  
300 (<https://www.proteinatlas.org>, <https://www.ebi.ac.uk/gxa/home>) was exploited to retrieve and  
301 compare the enrichment of tissue-exclusive paralogs. Accordingly, tissue-exclusive genes with

302 non-redundant descriptions (initially assessed by RNA-seq) were categorized as follows: 1)  
303 enriched genes in the same tissue in other animal models, 2) enriched genes in the same tissue and  
304 in other tissues present in the analysis, 3) genes expressed in almost all the analyzed tissues and 4)  
305 unclassified genes.

### 306 **Real-time qPCR Validation**

307 Duplicated genes from the analyzed tissues, covering a wide range of expression level among  
308 copies, were chosen for real-time qPCR validation: *cav3*, *myod1* and *myod2* (skeletal muscle);  
309 *slc6a19* and *aoc1* (intestine); *upp2* and *prom1* (liver); *lmo1* and *yjefn3* (gills); *gp2* and *hbb2*  
310 (spleen). Genbank accession numbers of the aforesaid duplicated transcripts are MN131091-  
311 MN131112. To complete the range of expression, *cdh15* (skeletal muscle), *cldn15* (intestine),  
312 *clec10a* (liver), *sox3* (gills) and *lgals1* (spleen) were included in the qPCR. The validation was  
313 performed on the same RNA individual samples used for RNA-seq. Primer design  
314 (Supplementary Table 1), reverse transcription, qPCR optimization and reactions were performed  
315 as previously detailed (Benedito-Palos et al., 2016). Specificity of reactions was verified by  
316 melting curves analyses and expression data were normalized to *β-actin* using the delta delta Ct  
317 method (Livak and Schmittgen, 2001). Pearson correlation coefficients were calculated in order to  
318 compare gene expression values for RNA-seq samples and qPCR expression data.  
319

## 320 **Results**

### 321 **Reads Sequencing Reveals a Large Genome Size**

322 Gilthead sea bream genome was assembled using a hybrid strategy involving Illumina  
323 NextSeq500 and PacBio RS II as sequencing platforms. An overview of the main stages and  
324 achievements of the project is shown in Figure 1. Data obtained from the two PE and two MP  
325 Illumina libraries reached ~94.8 Gb and ~11.7 Gb, respectively (see Supplementary Table 2). PE  
326

327 read assembly yielded 51,918 contigs with an N50 of 50.2 kb and an L50 of 6,823 contigs. The  
328 initial assembly was further improved by means of scaffolding with MP and SMRT reads  
329 followed by gap filling. This procedure resulted in 5,039 scaffolds (>750 bp length) with an N50  
330 scaffold length of 1.07 Mb and an L50 scaffold count of 227. At this end, the percentage of  
331 assembly in scaffolded contigs was 99.2% with a mean scaffold size of 247.38 kb and an average  
332 GC content of 39.82%. For more details in assembly metrics see Supplementary Table 3.

333 K-mer analysis using PE reads (Supplementary Figure 1A) showed 63-mer read length  
334 frequency with an estimated genome size of ~1.59 Gb (main peak), including 543 Mb of repeated  
335 k-mers (repeat peak). The total scaffold length was ~1.24 Gb, which represents 78% of the  
336 estimated total genome size. According to this, the average assembly coverage was 67.8x, and  
337 90% of the total assembled genome was included in the largest 1,613 scaffolds (Supplementary  
338 Figure 1B).

339 Super-scaffolding assembly was performed using 7,700 CNEs derived from the genetic  
340 linkage map of the first gilthead sea bream genome release (Pauletto et al., 2018). These CNEs,  
341 associated to unique positions within 932 scaffolds, served for ordering and orienting 57.8% of the  
342 scaffold assembly length (~732 Mb) in 24 super-scaffolds (Supplementary Figure 2). The resulting  
343 virtual gilthead sea bream karyotype can be viewed at [www.nutrigroup-iats.org/seabreambrowser](http://www.nutrigroup-iats.org/seabreambrowser).

### 344 **Multiple Gene Duplications Are Surrounded by Transposable Elements**

345 A first *ab initio* prediction of PCG was carried out using AUGUSTUS v3.3 (Stanke et al.,  
346 2008). To support the establishment of the PCG model, eight RNA-seq libraries from this study (6  
347 skeletal muscle, 2 intestine) in combination with additional libraries from liver (4), spleen (3) and  
348 gills (3) (retrieved from SRA archive) were processed to generate an Atlas of gene expression  
349 across tissues (see accession numbers in Data Availability). The sequenced reads were mapped  
350 against *ab initio* predictions, and 55,423 PCG were inferred based on RNA-seq transcriptome  
351

352 analysis and homology against SWISSPROT, NR or the IATS-CSIC gilthead sea bream  
353 transcriptome database (Calduch-Giner et al., 2013). This procedure generated a total of 21,275  
354 unique gene descriptions with 9,250 single-copy genes. Up to 90% of unique gene descriptions are  
355 comprised in the 1,613 largest scaffolds (Figure 2A). The average gene length is 10,134 bp with  
356 exon and intron mean sizes of 184 bp and 1,751 bp, respectively. This yields an average protein  
357 length of 375 amino acids. For super-scaffolded genes, the number of non-redundant protein  
358 descriptions decreases to 16,046 with an average gene size of 11,756 bp (Figure 2B). Dedupe  
359 redundancy analysis performed over the transcript set retrieved from RNA-seq revealed a total of  
360 559 duplicated genes, which represents a small fraction (1.01%) of segmental gene duplications  
361 (Supplementary Table 4). Furthermore, the number of containments (i.e. shorter overlapping  
362 contained sequences) at 98%, 95% and 90% of identity threshold was also very low (3.31%,  
363 5.05% and 6.83%, respectively).

364 At the scaffold level, the gilthead sea bream mobilome accounts for the 75% of the full  
365 genome size (944 Mb). More than 60% of this mobilome (599 Mb) is constituted by introns,  
366 whereas the rest of MGEs are widely spanned throughout the assembly (Supplementary Table 5).  
367 The predicted low complexity repeats (16.91%) spanned 160.5 Mb with approximately 160 Mb  
368 corresponding to 2,500 repeat families classified as *de novo* specific of gilthead sea bream. The  
369 remaining 0.5 Mb corresponded to known repeats (inverted and/or tandem repeats as well as  
370 satellites and microsatellites) also present in other fish genomes. Class I MGE (5.84%) comprised  
371 27.2 Mb of LTRs retroelements (*Ty3/Gypsy*, *BEL/Pao*, *Ty1/Copia* and *Retroviridae*-like), 27.8 Mb  
372 of non-LTR retroelements (distributed in 14 families, mainly LINES and SINES), and 0.2 Mb of  
373 YR-like DIRS retrotransposons. Class II MGE (10.55%) included 99.6 Mb split in 27 groups of  
374 DNA transposons (mainly *hAT*, *Tc1/mariner*, *PIF/Harbinger* and *PiggyBac* elements). The last  
375 fraction of the mobilome corresponded to non-coding RNA (1.25%) and chimeric/composite  
376 genes (1.95%). A complete list of non-coding RNA (ncRNA) genes is shown in Supplementary



377 Table 6, including both long (11 Mb constituted by 10 groups; mainly lincRNA, pseudogenes and  
378 processed transcripts) and small (1 Mb split in 11 groups mainly microRNA, tRNA and snoRNA)  
379 ncRNA. Chimeric/composite genes (i.e. those carrying exon traits constituted by MGEs) were  
380 split in 10 groups of loci: non-LTR retroelement traits (7 Mb), LTR retroelement traits (0.7 Mb),  
381 DNA transposon traits (5.8 Mb), ncRNA gene traits (0.053 Mb), repeats (0.001 Mb), viral-related  
382 traits (0.2 Mb) and YR retroelement traits (0.02 Mb), as well as clan AA peptidases (0.047 Mb),  
383 Scan/Krab genes (0.008 Mb) and unknown genes (4 Mb). For more specific details about  
384 chimeric/composite gene annotation see Supplementary Table 7. Krona representation of split  
385 sublevels of mobilome can be seen in Supplementary Figure 3.

### 386 **Chimeric Genes Enriched in Immune Response and Response to Stimulus Processes**

387 Functional annotation of gilthead sea bream genes using GO resulted in a diverse set of functional  
388 categories allocated to 43,221 genes (Cellular Component, 41,423; Molecular Function, 38,505;  
389 Biological Process, 38,588). The top 12 categories of each ontology for non-redundant protein  
390 descriptions are shown in Fig. 3A. Cellular component GO terms had the higher gene count with  
391 cytoplasm (GO:0005737; 20,689), plasma membrane (GO:0005886; 16,138) and integral to  
392 membrane (GO:0016021; 12,436) GO terms. The most abundant Molecular Function GO terms  
393 comprised metal ion binding (GO:0043167; 9,210), DNA binding (GO:0003677; 7,041) and ATP  
394 binding (GO:0005524; 6,518). The most represented biological process GO terms were  
395 transcription DNA-dependent (GO:0006351; 6,222), signal transduction (GO:0007165; 3,851) and  
396 multicellular organismal development (GO: 0007275; 2,908).

397  
398 When tested for enrichment of GO terms among chimeric/composite genes, the 3,648  
399 duplicated genes with 108 non-redundant protein annotations (Supplementary Table 8) rendered  
400 184 enriched biological processes (corrected P-value < 0.05). These genes covering different GO  
401 terms related to immune system (26%), cell cycle (16%), translational initiation (11%), response

402 to activity (11%), signal transduction (6%), developmental process (5%) and growth (2%) among  
403 others (Figure 3B). The relationship among functional categories is illustrated by a Venn diagram,  
404 showing 87 non-redundant gene descriptions of the main five functional categories (Figure 3C).  
405 This procedure highlighted that the high representation of immune system in chimeric/composite  
406 genes was mostly due to a wide overlapping of immune GO terms with the other enriched  
407 functional categories. Intriguingly, main intersections were found among immune system process,  
408 cell cycle and signal transduction, comprising 15 enriched GO terms and 15 unique gene  
409 descriptions, corresponding to different isoforms of protein NLRC3 and NACTH, LRR and PYD  
410 domains-containing protein 12.

### 411 **Genome Expansion is Supported by Synteny and Phylogenomic Analyses**

412 Homology relationships between genes contained in the assembled gilthead sea bream super-  
413 scaffolds and genes sequenced in other species, as well as their syntenic relationships were  
414 studied. From the 30,455 gilthead sea bream genes included in super-scaffolds, 25,806 (84.73%)  
415 had orthologs in at least one of the analyzed species, being Nile tilapia (*O. niloticus*, 20,561),  
416 zebra mbuna (*M. zebra*, 19,717), platyfish (*X. maculatus*, 15,093) and stickleback (*G. aculeatus*,  
417 14,612) the species sharing more orthologous genes with gilthead sea bream, whereas the lowest  
418 numbers of orthologous were obtained in rainbow trout (8,866) and zebrafish (*D. rerio*, 4,288)  
419 (Figure 4A). Likewise, the number of syntenic blocks ranged between 483 in *O. niloticus* to 32 in  
420 *D. rerio* (Supplementary Table 9). Thus, the levels of both orthology and synteny conservation  
421 reflects phylogenetic proximity among the compared species. Also, the number of orthologous  
422 genes in syntenic blocks were maximal in *O. niloticus* (9,914; 30.02%), *M. zebra* (9,499; 34.48%)  
423 and *G. aculeatus* (6,866; 46.85%), whereas salmonids and cyprinids showed the lowest levels of  
424 synteny with 1,284 (*O. mykiss*), 1,482 (Atlantic salmon, *S. salar*) and 44 (*D. rerio*) orthologous in  
425 syntenic blocks. The intra-species synteny rendered a total of 268 syntenic blocks in gilthead sea  
426

427 bream that comprised 1,131 paralogs. This feature as well as the high number of connections in  
428 the Circos plot of Fig. 4A is indicative of a highly duplicated genome.

429 To gain insights in the evolution of gilthead sea bream genome and study in more detail  
430 the origin of these high levels of genomic duplication, we inferred its phylome -i.e. the complete  
431 collection of gene evolutionary histories- across nineteen fully-sequenced vertebrate species. To  
432 provide a phylogenetic context to our comparisons, we reconstructed a species tree. This was  
433 made using two complementary approaches: 1) species tree concatenation of a total of 148 genes  
434 with one-to-one orthologous in each of the included species and 2) super-tree reconstruction using  
435 58,484 gene trees from the phylome. Both approaches resulted in the same highly supported  
436 topology (Figure 4B), which was fully consistent with the known relationships of the considered  
437 species. All trees and alignments are available to browse or download through PhylomeDB  
438 ([www.phylomedb.org](http://www.phylomedb.org)) (Huerta-Cepas et al., 2014) under the phylomeDB ID 714.

439 From the reconstructed gilthead sea bream phylome, we inferred that 45,162 genes had  
440 duplications. The fraction of duplicated genes remained high (17,596) after the removal of gene  
441 family expansions (i.e. those resulting in 5 or more in-paralogs). When duplication frequencies per  
442 branch in all lineages leading to the gilthead sea bream were computed, two peaks of high  
443 duplication ratios (average duplications per gene) were inferred at earliest splits of vertebrates and  
444 at the base of teleost fish (teleost-specific genome duplication), which correspond to the known  
445 WGDs (Figure 4B; clades 8, 12). Additionally, the gilthead sea bream genome also showed a high  
446 rate of species-specific duplications (2.024 duplications per gene; 0.385 duplications per gene  
447 after removing expansions). Functional GO enrichment of these duplicated genes highlighted  
448 different biological processes, mostly related to genome transposition, immune response and  
449 response to stimulus. This referred to the following GO terms: DNA integration (GO:0015074);  
450 transposition, DNA-mediated (GO:0006313); RNA-dependent DNA biosynthetic process  
451 (GO:0006278); developmental process, (GO:0032502); transposition, RNA-mediated

(GO:0032197); DNA recombination, (GO:0006310); immunoglobulin production (GO:0002377); detection of chemical stimulus involved in sensory perception (GO:0050907); regulation of T cell apoptotic process (GO:0070232); telomere maintenance (GO:0000723). In the case of immunoglobulin production, this stated to 24 unique gene descriptions including among others Ig heavy chain Mem5-like isoform X1, Ig heavy chain Mem5-like isoform X2, Ig kappa chain V region 3547, Ig kappa chain V region Mem5, Ig kappa chain V-II region 2S1.3, Ig kappa chain V-IV region Len, Ig lambda chain V-I region BL2, Ig lambda chain V-I region NIG-64, Ig lambda-3 chain C regions, Ig lambda-6 chain C region, Ig lambda-6 chain C region, Ig lambda-like polypeptide 1 isoforms X1, X3 and X4, Ig lambda-like polypeptide 5, pre-B lymphocyte protein 3, integral membrane protein 2A, laminin subunit alpha-2 or Ig kappa chin V19-17. Likewise, the regulation of T cell apoptotic process refers to microfibrillar-associated protein 1, tyrosine-protein kinase JAK2 and JAK3 in addition to different GTPases of IMAP family members (2, 4, 4-like, 8, 8-like). Lastly, the category detection of chemical stimulus involved a wide representation of olfactory receptors, including among others olfactory receptor 10J4-like, 11A11-like, 13C8-like, 146-like, 1M1-like, 2K2-like, 2S2-like, 4C15-like, 4K3-like, 4N5-like, 51G1-like, 5A5-like, 52D1-like, 52K1-like, 5B17-like and 6N1-like.

### **Wide Transcriptome Analysis Reveals Different Tissue Gene Duplication Signatures**

Up to 70% of the pre-processed reads of the RNA-seq tissue samples were mapped in the assembled genome, yielding 55,423 genes that are reduced to 16,992 after the removal of low expressed genes, low alignments high scoring pairs (HSP) and phylome-based paralogs. From these filtered sequences, up to 5,322 genes were recognized as ubiquitously expressed sequences in the analyzed tissues (Figure 5A). Intestine as a whole (anterior and posterior intestine segments) had the highest number of tissue-exclusive annotated genes (1,198), followed by gills (667), liver (256) and spleen (248) and skeletal white muscle (203). When unique gene descriptions were

477 considered, the order of tissues with a tissue-exclusive number of non-redundant molecular  
478 signatures was maintained: intestine (512) > gills (379) > liver (139) > spleen (131) > skeletal  
479 muscle (123) (Figure 5B). This yielded a variable percentage of duplicated genes from 28% in the  
480 consensus gene list (1.295 out of 4.625) for all the analyzed tissues to 20-17% in muscle and  
481 intestine, 12-10% in liver and gills and 6% in spleen. Likewise, the duplication rate ranged  
482 between 1.62 from the consensus list to 1.26-1.24 in muscle and intestine, 1.16 in liver, 1.13 in  
483 gills and 1.08 in spleen (Figure 5C). The final list of 1,284 tissue-exclusive genes (present in only  
484 one tissue) with their number of copies is shown in Supplementary Table 10.

485 Tissue-exclusive non-redundant paralogs of intestine, skeletal muscle, liver, spleen and  
486 gills are listed in Supplementary Table 11. According to the gene expression pattern in humans  
487 and other higher vertebrates (<https://www.proteinatlas.org/>, <https://www.ebi.ac.uk/gxa/home>),  
488 most of them (65-75%) were classified as tissue- or group-enriched genes (gills paralogs are not  
489 included in the analysis due to the lack of a reference expression Atlas for fish species) (Figure  
490 6A). This procedure yielded up to 65 tissue-exclusive paralogs (intestine, 30; skeletal muscle, 17;  
491 liver, 13; spleen, 5), showing expression changes between duplicated copies with a similar range  
492 of variation when the outliers from intestine (1) and gills (1) were not included in the analysis  
493 (Figure 6B). For some of them, including *cav3*, *myod1* and *myod2* (skeletal muscle); *slc6a19* and  
494 *aoc1* (intestine); *upp2* and *prom1* (liver); *lmo1* and *yjefn3* (gills); *gp2* and *hbb2* (spleen) the  
495 differential gene expression pattern for duplicated genes was validated by qPCR, and overall a  
496 high correlation was found for representative genes of all analyzed tissues (Supplementary Table  
497 12).

## 499 Discussion

500 Steady advances in sequencing technology and cost reduction are improving the ability to generate  
501 high-quality genomic sequences (Metzker, 2010). Certainly, the genome list in the NCBI database  
502 ([www.ncbi.nlm.nih.gov/genome/browse](http://www.ncbi.nlm.nih.gov/genome/browse)) contains 340 fish genomes from 248 fish species, with

503 more than 30 corresponding to fish species of special relevance given their economic importance  
504 or important role as research model species. In the present study, we have generated and made  
505 publicly available a high quality annotated assembly of the gilthead sea bream genome as an effort  
506 to generate new genomic tools for a highly cultured fish in all the Mediterranean area. Our  
507 sequencing strategy, combining short reads with long read libraries (Nextera MP and PacBio  
508 SMRT), has resulted in one of the best fish genome assemblies in terms of number of scaffolds per  
509 assembled size (5,039 scaffolds in a 1.24 Gb assembly). Previous attempts in closely related fish  
510 resulted in highly fragmented reference genomes due to the use of assembly protocols based solely  
511 on short-read sequencing approaches. For instance, the public genomes of European sea bass  
512 (*Dicentrarchus labrax*; 680 Mb), spotted green pufferfish (*T. nigroviridis*; 342 Mb) or the  
513 Amazon molly (*Poecilia formosa*; 830 Mb) are split in 46,509, 27,918 and 25,474 scaffolds,  
514 respectively (Jaillon et al., 2004; Tine et al., 2014; Warren et al., 2018). Likewise, the first  
515 gilthead sea bream genome draft comprised 55,202 scaffolds in a 760 Mb assembly (Pauletto et  
516 al., 2018). In concurrence with the present study, a new genome draft of gilthead sea bream was  
517 submitted to NCBI (Bioproject accession PRJEB31901), comprising ~833 Mb, which is still  
518 below our assembly. This yielded a higher number of unique gene annotated descriptions when  
519 comparing our assembled genome with the two previous releases (21,275 vs. 13,835-19,631).

520 Fish comprise the largest and most diverse group of vertebrates, ranging the size of  
521 sequenced genomes between 342 Mb in *T. nigroviridis* to 2.90 Gb in *S. salar* (Yuan et al., 2018).  
522 Our unmasked assembled genome is, thereby, of intermediate size (1.24 Gb), although the full  
523 genome is expected to be around 350 Mb longer. Indeed, the current assembly contains more than  
524 5,000 unique gene descriptions that are not present in the super-scaffolding based on the first  
525 genome draft (Pauletto et al., 2018). Estimations of gilthead sea bream genome size based on flow  
526 cytometry of red blood cells rendered a smaller genome size (~930 Mb) (Peruzzi et al., 2005).  
527 Nevertheless, the accuracy of the technique is limited due to high intra- (up to 10%) and inter-

528 assay (20-26%) sources of variation (Pedersen, 1971; Gregory, 2005). Certainly, differences in  
529 internal/external genome size standards, sample preparation, staining strategies or stochastic drift  
530 of instruments might result in significant differences in such genome size estimations (Doležel et  
531 al., 1998), and consequently computational methods (e.g. k-mer frequency counts) are emerging as  
532 more reliable approaches for genome size estimations (Sun et al., 2018).

533 Another important output from our k-mer count analysis was a pronounced second peak  
534 that is indicative of a high amount of repeated sequences. In this regard, the results of redundancy  
535 analysis based on actively transcribed genes approximated a low fraction of segmental  
536 duplications (1.01%) that is indicative of a reduced genome mis-assembly (Kelley and Salzberg,  
537 2010). Accordingly, most of the gene predictions reported by us showed a sufficient degree of  
538 divergence to support the idea of true gene expansions. Reliable gene duplication was also  
539 supported by synteny analysis, which makes difficult to establish inter-species synteny blocks  
540 probably as the result of the over-representation of gene expansions during the recent evolution of  
541 the gilthead sea bream lineage. This was confirmed by phylome analysis, which showed an  
542 average of 2.024 copies for the 55,423 actively transcribed genes, in at least one of the analyzed  
543 tissues as a representation of metabolically- and immune-relevant tissues. This number of tissue-  
544 regulated transcripts with a high percentage of duplications offers the possibility of an enhanced  
545 adaptive plasticity in a challenging evolutionary environment. Certainly, paralog retention in fish  
546 is usually related to specific adaptive traits driven by their particular environments (Maere et al.,  
547 2005). Examples of this are the expansion of the antifreeze glycoprotein Afp in Antarctic  
548 notothenioid fish (Chen et al., 2008) or the claudins and aquaporins in European sea bass (Tine et  
549 al., 2014). At the global level, the highest percentages of duplicated genes are reported for eel  
550 (36.6%) and zebrafish (31.9%) (Inoue et al., 2015), but intriguingly the values reported by us in  
551 gilthead sea bream (56.5%) are even higher for the duplication ratio calculated as the percentage  
552 of non-redundant duplicated annotations.

553           Importantly, gene functional enrichment in lineage-specific duplicated genes of gilthead  
554 sea bream evidenced an increased presence of DNA integration, transposition and  
555 immunoglobulin production. This finding suggests that most of the expansions undergone by the  
556 gilthead sea bream genome derive from the activities of MGEs and from the immune response as  
557 key processes in the species adaptability. Immune genes play a crucial role in the survival and  
558 environmental adaptation of species, and are particularly important in aquatic animals, which are  
559 continuously and directly exposed to an environment with water-borne pathogens. Thus, duplicate  
560 retentions and tandem repeats are commonly found among fish immune genes, with special  
561 relevance in those involved in pathogen recognition systems and inhibitors/activators of  
562 inflammation (Howe et al., 2016; Li et al., 2017). In fact, the immunoglobulin loci of teleosts are  
563 among the largest and most complex described, sometimes containing even several hundreds of V  
564 genes (Fillatreau et al., 2013). This scenario seems to be likely orchestrated by selfish elements  
565 (introns, repeats, transposons, gene families), which trigger genomic rearrangements,  
566 substitutions, deletions and insertions (Kidwell, 2002), leading to the increment of size and  
567 complexity of the genome in addition to new gene combinations that result in modified or new  
568 biological functions (Lynch and Conery, 2000).

569           The characterized mobilome highlighted an abundant representation of MGEs as well as a  
570 number of chimeric genes that apparently evolved from the co-domestication and/or co-option of  
571 MGEs. Co-option is indeed a recurrent mechanism that has contributed to innovations at various  
572 levels of cell signalling and gene expression several times during the evolution of vertebrates  
573 (Arkhipova et al., 2012). The most represented source of gene co-option in our gilthead sea bream  
574 genome were LINE retrotransposons and *Tc1/Mariner* DNA-transposons, which have been  
575 extensively reported in mammalian models as examples of transposable elements domestication  
576 (Jangam et al., 2017). Among these chimeric genes (Supplementary Table 7), a relevant number of  
577 NOD-like receptors (NLRs), including NACHT-, LRR- and PYD-containing proteins (NLRP) and



578 NOD-like receptor CARD domains (NLRCs), emerged. These receptors are innate sensors  
579 involved in intracellular monitoring to detect pathogens that have escaped to extracellular and  
580 endosomal surveillance. Fish are in fact the first in evolution to possess a fully developed adaptive  
581 immune system. However, due to the environment they live in, they still rely on and maintain a  
582 wide array of innate effectors, showing an impressive species-specific expansion of these genes  
583 (Stein et al., 2007), as is the case for the more than 400 NLR family members in zebrafish (Li et  
584 al., 2017). These duplications reflect the evolutionary need of detecting threats in a pathogen rich  
585 environment, and correlate to the diversity of habitats with species-specific traits in teleosts, the  
586 largest group of vertebrates.

587 Analysis of RNA-seq active transcripts across five different tissues also pointed out the  
588 association of gene duplication with different tissue expression patterns. Indeed, gene duplication  
589 and subsequent divergence is basic for the evolution of gene functions, although the role of  
590 positive selection in the fixation of duplicated genes remains an open question (Kidwell, 2002;  
591 Kondrashov, 2012). A highly conservative filtering step was applied in our gene dataset in order to  
592 avoid genetic redundancy or pseudogeneization that could be potentially mistaken as true  
593 duplication events (Innan and Kondrashov, 2010). This procedure showed higher duplication  
594 levels in genes expressed in two or more tissues as compared to those with a tissue-exclusive  
595 expression, being in accordance the annotation and functions of the tissue-exclusive paralogs with  
596 the reference Atlas of tissue gene expression of higher vertebrates. This fact is in agreement with  
597 earlier studies demonstrating that in a tissue functionalization context (i.e. gene copies expressed  
598 in several tissues), gene duplication leads to increased levels of tissue specificity (Huerta-Cepas et  
599 al., 2011). Likewise, we observed herein that gene copies expressed in two or more tissues showed  
600 increased duplication rates and percentages of retained paralogs in comparison to tissue-exclusive  
601 genes. Analysis of qPCR, designed to discriminate the expression patterns of selected tissue-  
602 exclusive paralogs (liver, 2; skeletal muscle, 3; intestine, 2; gills, 2; spleen, 2), further emphasized

603 this functional divergence towards a more specific regulation of duplicated genes. However, future  
604 studies (combining both targeted and untargeted transcriptome approaches) are still needed to  
605 clarify the relationship between the gene expressions of duplicated genes and specific phenotypic  
606 traits. Although at this stage, it appears conclusive that the genome of gilthead sea bream has  
607 retained an increased number of duplications in comparison to closest relatives. In comparison to  
608 other modern fish lineages, this higher gene duplication ratio is also extensive to salmonids and  
609 cyprinids (Macqueen and Johnston, 2014; Chen et al., 2019) that still conserved signatures of a  
610 WGD in their genome. Since the gene repertory of gilthead sea bream is also characterized by the  
611 persistence of multiple gene copies for a given duplication, it is likely that this feature is mostly  
612 the result of highly active MGEs, allowing the improved plasticity across the evolution of a fish  
613 family with a remarkable habitat diversification (Sbragaglia et al., 2019). This observation,  
614 together with a recent eel transcriptome study, renew the discussion about fish lineage specific re-  
615 diploidization after 3R or even an additional WGD (Rozenfeld et al., 2019).

616 In summary, a combined sequencing strategy of short- and long-reads produced a high  
617 quality draft of gilthead sea bream genome that can be accessed by a specific genome browser that  
618 includes a karyotype alignment. The high coverage and depth of this assembly result in a valuable  
619 resource for forthcoming NGS-based applications (such as RNA-seq or Methyl-seq),  
620 metatranscriptome analysis, quantitative trait loci (QTLs) and gene spatial organization studies  
621 conducted to improve the traits of this highly cultured farmed fish. Assembly analysis suggests  
622 that transposable elements are probably the major cause of the enlarged genome size with a high  
623 number of functionally specialized paralogs under tissue-exclusive regulation. These findings  
624 highlight the genome plasticity of a protandric, euryhalin and eurytherm fish species, offering the  
625 possibility to further orientate domestication and selective breeding towards more robust and  
626 efficient fish, making gilthead sea bream an excellent model to investigate the processes driving  
627 genome expansion in higher vertebrates.

628

## 629 **Data Availability**

630 Raw sequence reads generated during the current study were deposited in the Sequence Read  
631 Archive of the National Center for Biotechnology Information (NCBI). Primary accession  
632 numbers: PRJNA551969 (Bioproject ID); SAMN12172390-SAMN12172427 (genomic Illumina  
633 Nextseq500 PE, MP and PacBio RS II raw reads); SAMN12172428-SAMN12172433 (RNA-seq  
634 Illumina NextSeq500 SE raw reads from skeletal white muscle); SAMN12172434,  
635 SAMN12172435 (RNA-seq Illumina NextSeq500 PE raw reads from anterior and posterior  
636 intestine). PRJNA507368 (Bioproject ID for raw reads from gills, liver and spleen tissues);  
637 SRR8255950, SRR8255962-70 (RNA-seq Illumina NextSeq500 raw reads from gills, liver and  
638 spleen tissues). All phylogenetic trees and alignments of the gilthead sea bream genome are  
639 publicly available through phylomeDB (<http://www.phylomedb.org>, phylome ID 714). A genome  
640 browser was built for the navigation and query of the assembled sequences in [http://nutrigrroup-  
642 iats.org/seabreambrowser](http://nutrigrroup-<br/>641 iats.org/seabreambrowser).

## 643 **Conflict of Interest**

644 The authors declare that the research was conducted in the absence of any commercial or financial  
645 relationships that could be construed as a potential conflict of interest.

## 647 **Author contributions**

648 This study was designed and coordinated by JP-S. Material from gilthead sea bream used for  
649 genome sequencing was extracted by J-AC-G and JP-S. Genome assembly and annotation were  
650 performed by BS and CL. Evolutionary and phylogenomics analysis were performed by TG.  
651 Genome browser was implemented by AH. Data analysis and integration were performed by FN-  
652 C, J-AC-G, M-CP, AS-B and JP-S. All authors read, discussed, edited and approved the final  
653 manuscript.

654

655

## **Funding**

656

This work was financed by Spanish (Intramural CSIC, 1201530E025; MICINN

657

BreamAquaINTECH, RTI2018-094128-B-I00) and European Union (AQUAEXCEL<sup>2020</sup>, 652831)

658

projects to JP-S. BS was supported by a predoctoral research fellowship (Doctorados industriales,

659

DI-17-09134) from Spanish MINECO.

660

661

## **Acknowledgements**

662

The authors thank M. A. González for technical assistance with gene expression analyses.

663

664

## References

665

Alarcón, J. A., Magoulas, A., Georgakopoulos, T., Zouros, E., and Alvarez, M. C. (2004). Genetic comparison of wild and cultivated European populations of the gilthead sea bream (*Sparus aurata*). *Aquaculture* 230, 65-80. doi: 10.1016/S0044-8486(03)00434-4

666

667

668

669

670

671

672

673

Al-Shahrour, F., Minguez, P., Tárraga, J., Medina, I., Alloza, E., Montaner, D. et al., (2007). FatiGO +: a functional profiling tool for genomic data. Integration of functional annotation, regulatory motifs and interaction data with microarray experiments. *Nucleic Acids Res.* 35, W91-96. doi: 10.1093/nar/gkm260

674

675

676

677

678

679

680

Altschul, S. F., Gish, W., Miller, W., Myers, E. W., and Lipman, D. J. (1990). Basic local alignment search tool. *J. Mol. Biol.* 215, 403-410. doi: 10.1016/S0022-2836(05)80360-2

681

682

683

684

685

686

687

688

Arkhipova, I. R., Batzer, M. A., Brosius, J., Feschotte, C., Moran, J. V., Schmitz, J., et al., (2012). Genomic impact of eukaryotic transposable elements. *Mob. DNA* 3, 19. doi: 10.1186/1759-8753-3-19

689

690

691

692

Bao, W., Kojima, K. K., and Kohany, O. (2015). Repbase Update, a database of repetitive elements in eukaryotic genomes. *Mob. DNA*. 6, 11. doi: 10.1186/s13100-015-0041-9

693

694

695

696

697

Benedito-Palos, L., Ballester-Lozano, G. F., Simó, P., Karalazos, V., Ortiz, A., Calduch-Giner, J. A., et al., (2016). Lasting effects of butyrate and low FM/FO diets on growth performance, blood haematology/biochemistry and molecular growth-related markers in gilthead sea bream (*Sparus aurata*). *Aquaculture* 454, 8-18. doi: 10.1016/j.aquaculture.2015.12.008

698

699

700

701

Ben Slimen, H., Guerbej, H., Ben Othmen, A., Ould Brahim, I., Blel, H., and Chatti, N. (2004). Genetic differentiation between populations of gilthead sea bream (*Sparus aurata*) along the tunisian coast. *Cybiu* 28, 45-50.

702

703

704

705

706

Bermejo-Nogales, A., Nederlof, M., Benedito-Palos, L., Ballester-Lozano, G. F., Folkedal, O., Olsen, R. E., et al., (2014). Metabolic and transcriptional responses of gilthead sea bream (*Sparus aurata* L.) to environmental stress: New insights in fish mitochondrial phenotyping. *Gen. Comp. Endocr.* 205, 305-315. doi: 10.1016/j.ygcen.2014.04.016

707

708

709

710

711

Berthelot, C., Brunet, F., Chalopin, D., Juanchich, A., Bernard, M., Noël, B., et al., (2014). The rainbow trout genome provides novel insights into evolution after whole-genome duplication in vertebrates. *Nat. Commun.* 5, 3657. doi: 10.1038/ncomms4657

712

713

714

715

716

717

Calduch-Giner, J. A., Bermejo-Nogales, A., Benedito-Palos, L., Estensoro, I., Ballester Lozano, G., Sitjà-Bobadilla, A., et al., (2013). Deep sequencing for de novo construction of a marine fish (*Sparus aurata*) transcriptome database with a large coverage of protein-coding transcripts. *BMC Genomics* 14, 178. doi: 10.1186/1471-2164-14-178

718

719

720

721

Calduch-Giner, J. A., Davey, G., Saera-Vila, A., Houeix, B., Talbot, A., Prunet, P., et al., (2010). Use of microarray technology to assess the time course of liver stress response after confinement exposure in gilthead sea bream (*Sparus aurata* L.). *BMC Genomics* 11, 193. doi: 10.1186/1471-2164-11-193

722

- 712 Capella-Gutiérrez, S., Silla-Martínez, J. M., and Gabaldón, T. (2009). TrimAl: a tool for  
713 automated alignment trimming in large-scale phylogenetic analyses. *Bioinformatics* 25, 15. doi:  
714 10.1093/bioinformatics/btp348
- 715  
716 Castanheira, M. F., Herrera, M., Costas, B., Conceição, L. E. C., and Martins, C. I. M. (2013).  
717 Linking cortisol responsiveness and aggressive behaviour in gilthead seabream *Sparus aurata*:  
718 indication of divergent coping styles. *Appl. Anim. Behav. Sci.* 143, 75-78. doi:  
719 10.1016/j.applanim.2012.11.008
- 720  
721 Chaoui, L., Kara, M. H., Quignard, J. P., Faure, E., and Bonhomme, F. (2009). Strong  
722 genetic differentiation of the gilthead sea bream *Sparus aurata* (L., 1758) between the two  
723 western banks of the Mediterranean. *C R Biol.* 332, 329-335. doi:  
724 10.1016/j.crvi.2008.11.002
- 725  
726 Chen, L., Qiu, Q., Jiang, Y., Wang, K., Lin, Z., and Li, Z. (2019). Large-scale ruminant genome  
727 sequencing provides insights into their evolution and distinct traits. *Science* 364, eaav6202. doi:  
728 10.1126/science.aav6202
- 729  
730 Chen, Z., Cheng, C. H., Zhang, J., Cao, L., Chen, L., Zhou, L., et al., (2008). Transcriptomic and  
731 genomic evolution under constant cold in Antarctic notothenioid fish. *Proc. Natl. Acad. Sci. USA*  
732 105, 12944-12949. doi: 10.1073/pnas.0802432105
- 733  
734 Chen, Z., Omori, Y., Koren, S., Shirokiya, T., Kuroda, T., Miyamoto, A., et al., (2019). *De novo*  
735 assembly of the goldfish (*Carassius auratus*) genome and the evolution of genes after whole-  
736 genome duplication. *Sci. Adv.* 26, eaav0547. doi: 10.1126/sciadv.aav0547
- 737  
738 Cordero, H., Cuesta, A., Meseguer, J., and Esteban, M. A. (2016) Characterization of the gilthead  
739 seabream (*Sparus aurata* L.) immune response under a natural lymphocystis disease virus  
740 outbreak. *J. Fish Dis.* 39, 1467-1476. doi: 10.1111/jfd.12481
- 741  
742 Cunningham, F., Amode, M. R., Barrell, D., Beal, K., Billis, K., Brent, S., et al., (2015). Ensembl  
743 2015. *Nucleic Acids Res.* 43, D662-669. doi: 10.1093/nar/gku1010
- 744  
745 Davidson, N. M., and Oshlack, A. (2014). Corset: enabling differential gene expression analysis  
746 for de novo assembled transcriptomes. *Genome Biol.* 15, 410. doi: 10.1186/s13059-014-0410-6
- 747  
748 Dehal, P., and Boore, J. L. (2005). Two rounds of whole genome duplication in the ancestral  
749 vertebrate. *PLoS Biol.* 3, e314. doi: 10.1371/journal.pbio.0030314
- 750  
751 De Innocentiis, S., Lesti, A., Livi, S., Rossi, A. R., Crosetti, D., and Sola, L. (2004). Microsatellite  
752 markers reveal population structure in gilthead sea bream *Sparus aurata* from Atlantic Ocean and  
753 Mediterranean Sea. *Fisheries Sci.* 70, 852-859. doi: 10.1111/j.1444-2906.2004.00879.x
- 754  
755 Doležel, J., Greilhuber, J., Lucretti, S., Meister, A., Lysák, M. A., Nardi, L., et al., (1998) Plant  
756 genome size estimation by flow cytometry: inter-laboratory comparison. *Ann. Bot.* 82, 17-26. doi:  
757 10.1093/oxfordjournals.aob.a010312
- 758  
759 Edgar, R. C. (2004). MUSCLE: a multiple sequence alignment method with reduced time and  
760 space complexity. *BMC Bioinformatics* 5, 113. doi: 10.1186/1471-2105-5-113
- 761

- 762 English, A. C., Richards, S., Han, Y., Wang, M., Vee, V., Qu, J., et al., (2012). Mind the gap:  
763 upgrading genomes with Pacific Biosciences RS long-read sequencing technology. *PloS One* 7,  
764 e47768. doi: 10.1371/journal.pone.0047768
- 765  
766 Estensoro, I., Ballester-Lozano, G. F., Benedito-Palos, L., Grammes, F., Martos-Sitcha, J. A.,  
767 Mydland, L., et al., (2016). Dietary butyrate helps to restore the intestinal status of a marine teleost  
768 (*Sparus aurata*) fed extreme diets low in fish meal and fish oil. *PLoS ONE* 11, e0166564. doi:  
769 10.1371/journal.pone.0166564
- 770  
771 FAO. (2019). FishStatJ - software for fishery statistical time series.  
772 <http://www.fao.org/fishery/statistics/software/fishstatj>.
- 773  
774 Fillatreau, S., Six, A., Magadan, S., Castro, R., Sunyer, J. O., and Boudinot, P. (2013). The  
775 astonishing diversity of Ig classes and B cell repertoires in teleost fish. *Front. Immunol.* 4, 28. doi:  
776 10.3389/fimmu.2013.00028
- 777  
778 Franchini, P., Sola, L., Crosetti, D., Milana, V., and Rossi, A. R. (2012). Low levels of population  
779 genetic structure in the gilthead sea bream, *Sparus aurata*, along the coast of Italy. *ICES J. Mar.*  
780 *Sci.* 69, 41-50. doi: 10.1093/icesjms/fsr175
- 781  
782 Futami, R., Muñoz-Pomer, A., Viu, J. M., Dominguez-Escribá, L., Covelli, L., et al., (2011).  
783 GPRO: The professional tool for annotation, management and functional analysis of omic  
784 sequences and databases. *Biotechnava Bioinformatics 2011-SOFT3*
- 785  
786 Gao, S., Sung, W. K., and Nagarajan, N. (2011). Opera: reconstructing optimal genomic scaffolds  
787 with high-throughput paired-end sequences. *J. Comput. Biol.* 18, 1681-1691. doi:  
788 10.1089/cmb.2011.0170
- 789  
790 Gil-Solsona, R., Caldach-Giner, J. A., Nacher-Mestre, J., Lacalle-Bergeron, L., Sancho, J. V.,  
791 Hernández, F., et al., (2019). Contributions of MS metabolomics to gilthead sea bream (*Sparus*  
792 *aurata*) nutrition. Serum fingerprinting of fish fed low fish meal and fish oil diets. *Aquaculture*  
793 498, 503-512. doi: 10.1016/j.aquaculture.2018.08.080
- 794  
795 Gregory, T. R. (2005). Animal Genome Size Database. <http://www.genomesize.com/faq.php>.
- 796  
797 Guindon, S., Dufayard, J., Lefort, V., Anisimova, M., Hordijk, W., and Gascuel, O. (2010). New  
798 algorithms and methods to estimate maximum-likelihood phylogenies: assessing the performance  
799 of PhyML 3.0. *Syst. Biol.*, 59 3, 307-21. doi: 10.1093/sysbio/syq010
- 800  
801 Howe, K., Schiffer, P. H., Zielinski, J., Wiehe, T., Laird, G. K., Marioni, J. C., et al., (2016).  
802 Structure and evolutionary history of a large family of NLR proteins in the zebrafish. *Open Biol.*  
803 6, 160009. doi: 10.1098/rsob.160009
- 804  
805 Huerta-Cepas, J., Capella-Gutiérrez, S., Pryszcz, L. P., Marcet-Houben, M., and Gabaldón, T.  
806 (2014). PhylomeDB v4: zooming into the plurality of evolutionary histories of a genome. *Nucleic*  
807 *Acids Res.* 42, D897-902. doi: 10.1093/nar/gkt1177
- 808  
809 Huerta-Cepas, J., Dopazo, J., and Gabaldón, T. (2010). ETE: a python environment for tree  
810 exploration. *BMC Bioinformatics* 11, 24. doi: 10.1186/1471-2105-11-24
- 811

- 812 Huerta-Cepas, J., Dopazo, J., Huynen, M. A., and Gabaldón, T. (2011). Evidence for short-time  
813 divergence and long-time conservation of tissue-specific expression after gene duplication. *Brief.*  
814 *Bioinform.* 12, 422-428. doi: 10.1093/bib/bbr022
- 815  
816 Huerta-Cepas, J., and Gabaldón, T. (2011). Assigning duplication events to relative temporal  
817 scales in genome-wide studies. *Bioinformatics* 27, 38-45. doi: 10.1093/bioinformatics/btq609
- 818  
819 Innan, H., and Kondrashov, F. (2010). The evolution of gene duplications: classifying and  
820 distinguishing between models. *Nat. Rev. Genet.* 11, 97-108. doi: 10.1038/nrg2689
- 821  
822 Inoue, J., Sato, Y., Sinclair, R., Tsukamoto, K., and Nishida, M. (2015) Rapid genome reshaping  
823 by multiple-gene loss after whole-genome duplication in teleost fish suggested by mathematical  
824 modeling. *PNAS* 112, 14918-14923. doi: 10.1073/pnas.1507669112
- 825  
826 Jaillon, O., Aury, J. M., Brunet, F., Petit, J. L., Stange-Thomann, N., Mauceli, E., et al., (2004).  
827 Genome duplication in the teleost fish *Tetraodon nigroviridis* reveals the early vertebrate proto-  
828 karyotype. *Nature* 431, 946-957. doi: 10.1038/nature03025
- 829  
830 Jangam, D., Feschotte, C., and Betrán, E. (2017). Transposable element domestication as an  
831 adaptation to evolutionary conflicts. *Trends Genet.* 33, 817-831. doi: 10.1016/j.tig.2017.07.011
- 832  
833 Kajitani, R., Toshimoto, K., Noguchi, H., Toyoda, A., Ogura, Y., Okuno, M., et al., (2014).  
834 Efficient de novo assembly of highly heterozygous genomes from whole-genome shotgun  
835 short reads. *Genome Res.* 24, 1384-1395. doi: 10.1101/gr.170720.113
- 836  
837 Kasahara, M., Naruse, K., Sasaki, S., Nakatani, Y., Qu, W., Ahsan, B., et al., (2007). The medaka  
838 draft genome and insights into vertebrate genome evolution. *Nature* 44, 714-719. doi:  
839 10.1038/nature05846
- 840  
841 Katoh, K., Kuma, K., Toh, H., and Miyata, T. (2005). MAFFT version 5: improvement in  
842 accuracy of multiple sequence alignment. *Nucleic Acids Res.* 33, 511-518. doi:  
843 10.1093/nar/gki198
- 844  
845 Keller, O., Odronitz, F., Stanke, M., Kolimar, M., and Waack, S. (2008). Scipio: Using protein  
846 sequences to determine the precise exon/intron structures of genes and their orthologs in closely  
847 related species. *BMC Bioinformatics* 9, 278. doi: 10.1186/1471-2105-9-278
- 848  
849 Kelley, D. R., and Salzberg, S. L. (2010). Detection and correction of false segmental duplications  
850 caused by genome mis-assembly. *Genome Biol.* 11, R28. doi:10.1186/gb-2010-11-3-r28
- 851  
852 Kent, W. J. (2002). BLAT--the BLAST-like alignment tool. *Genome Res.* 12, 656-664. doi:  
853 10.1101/gr.229202
- 854  
855 Kidwell, M. G. (2002). Transposable elements and the evolution of genome size in eukaryotes.  
856 *Genetica* 115, 49-63. doi: 10.1023/A:1016072014259
- 857  
858 Kliebenstein D. J. (2008). A role for gene duplication and natural variation of gene expression in  
859 the evolution of metabolism. *PloS one* 3(3), e1838. doi:10.1371/journal.pone.0001838
- 860



- 861 Kondrashov, F. A. (2012). Gene duplication as a mechanism of genomic adaptation to a changing  
862 environment. *Proc. Biol. Sci.* 279, 5048-5057. doi: 10.1098/rspb.2012.1108  
863
- 864 Koren, S., Walenz, B. P., Berlin, K., Miller, J. R., Bergman, N. H., and Phillippy, A. M. (2017).  
865 Canu: scalable and accurate long-read assembly via adaptive k-mer weighting and repeat  
866 separation. *Genome Res.* 27, 722-736. doi: 10.1101/gr.215087.116  
867
- 868 Krzywinski, M., Schein, J., Birol, I., Connors, J., Gascoyne, R., Horsman, D., et al., (2009).  
869 Circos: An information aesthetic for comparative genomics. *Genome Res.* 19, 1639-1645. doi:  
870 10.1101/gr.092759.109  
871
- 872 Langham, R. J., Walsh, J., Dunn, M., Ko, C., Goff, S. A., and Freeling, M. (2004). Genomic  
873 duplication, fractionation and the origin of regulatory novelty. *Genetics* 166, 935-945. doi:  
874 10.1534/genetics.166.2.935  
875
- 876 Langmead, B., Trapnell, C., Pop, M. and Salzberg, S. L. (2009). Ultrafast and memory-efficient  
877 alignment of short DNA sequences to the human genome. *Genome Biol.* 10, R25. doi: 10.1186/gb-  
878 2009-10-3-r25  
879
- 880 Lassmann, T., and Sonnhammer, E. L. (2005). Kalign-an accurate and fast multiple sequence  
881 alignment algorithm. *BMC Bioinformatics* 6, 298. doi: 10.1186/1471-2105-6-298  
882
- 883 López-Olmeda, J. F., Montoya, A., Oliveira, C., and Sánchez-Vázquez, F. J. (2009).  
884 Synchronization to light and restricted-feeding schedules of behavioral and humoral daily rhythms  
885 in gilthead sea bream (*Sparus aurata*). *Chronobiol. Int.* 6, 1389-1408. doi:  
886 10.3109/07420520903421922  
887
- 888 Li, Y., Li, Y., Cao, X., Jin, X., and Jin, T. (2017). Pattern recognition receptors in zebrafish  
889 provide functional and evolutionary insight into innate immune signaling pathways. *Cell. Mol.*  
890 *Immunol.* 14, 80-89. doi: 10.1038/cmi.2016.50  
891
- 892 Livak, K. J., and Schmittgen, T. D. (2001) Analysis of relative gene expression data using real-  
893 time quantitative PCR and the  $2^{-\Delta\Delta C_T}$  method. *Methods* 25, 402-408. doi:  
894 10.1006/meth.2001.1262  
895
- 896 Llorens, C., Futami, R., Covelli, L., Domínguez-Escribà, L., Viu, J. M., Tamarit, D., et al., (2011).  
897 The Gypsy Database (GyDB) of mobile genetic elements: release 2.0. *Nucleic Acids Res.* 39, D70-  
898 D74. doi: 10.1093/nar/gkq1061  
899
- 900 Lu, J., Peatmap, E., Tang, H., Lewis, J., and Liu, Z. (2012). Profiling of gene duplication patterns  
901 of sequenced teleost genomes: evidence for rapid lineage-specific genome expansion mediated by  
902 recent tandem duplications. *BMC Genomics* 13(246), 1-10. doi: 10.1186/1471-2164-13-246  
903
- 904 Luo, R., Liu, B., Xie, Y., Li, Z., Huang, W., Youan, J., et al., SOAPdenovo2: an empirically  
905 improved memory-efficient short-read de novo assembler. *Gigascience* 1, 18. doi: 10.1186/2047-  
906 217X-1-18  
907
- 908 Lynch, M., and Conery, J. S. (2000). The evolutionary fate and consequences of duplicate genes.  
909 *Science* 290, 1151-1155. doi: 10.1126/science.290.5494.1151  
910

- 911 Macqueen, D. J., and Johnston, I. A. (2014). A well-constrained estimate for the timing of the  
912 salmonid whole genome duplication reveals major decoupling from species diversification. *Proc.*  
913 *Biol. Sci.* 281, 20132881. doi: 10.1098/rspb.2013.2881
- 914  
915 Maere, S., De Bodt, S., Raes, J., Casneuf, T., Van Montagu, M., Kuiper, M., et al., (2005).  
916 Modeling gene and genome duplications in eukaryotes. *Proc. Natl. Acad. Sci. USA* 102, 5454-  
917 5459. doi: 10.1073/pnas.0501102102
- 918  
919 Magnoni, L. J., Martos-Sitcha, J. A., Queiroz, A., Calduch-Giner, J. A., Magalhães Gonçalves J.  
920 F., Rocha, C. M. R., et al., (2017). Dietary supplementation of heat-treated *Gracillaria* and *Ulva*  
921 seaweeds enhanced acute hypoxia tolerance in gilthead sea bream (*Sparus aurata*). *Biol. Open* 6,  
922 897-908. doi: 10.1242/bio.024299
- 923  
924 Marçais, G., and Kingsford, C. (2011). A fast, lock-free approach for efficient parallel counting of  
925 occurrences of k-mers. *Bioinformatics* 27, 764-770. doi: 10.1093/bioinformatics/btr011
- 926  
927 Martin M. (2011). Cutadapt removes adapter sequences from high-throughput sequencing reads.  
928 *EMBnet j.* 17, 10-12. doi: 10.14806/ej.17.1.200
- 929  
930 Martos-Sitcha, J. A., Bermejo-Nogales, A., Calduch-Giner, J. A., and Pérez-Sánchez, J. (2017).  
931 Gene expression profiling of whole blood cells supports a more efficient mitochondrial respiration  
932 in hypoxia-challenged gilthead sea bream (*Sparus aurata*). *Front. Zool.* 14, 34. doi:  
933 10.1186/s12983-017-0220-2
- 934  
935 Martos-Sitcha, J. A., Simó-Mirabet, P., de las Heras, V., Calduch-Giner, J. A., and Pérez-Sánchez,  
936 J. (2019). Tissue-specific orchestration of gilthead sea bream resilience to hypoxia and high  
937 stocking density. *Front. Physiol.* 10, 840. doi: 10.3389/fphys.2019.00840
- 938  
939 Mata-Sotres, J. A., Martínez-Rodríguez, G., Pérez-Sánchez, J., Sánchez-Vazquez, F. J., and  
940 Yúfera, M. (2015). Daily rhythms of clock gene expression and feeding during the larval  
941 development in gilthead sea bream, *Sparus aurata*. *Chronobiol. Int.* 32, 1061-1074. doi:  
942 10.3109/07420528.2015.1058271
- 943  
944 Metzker, M. L. (2010). Sequencing technologies - the next generation. *Nat. Rev. Genet.* 11, 31-46.  
945 doi: 10.1038/nrg2626
- 946  
947 Min, X. J., Butler, G., Storms, R., and Tsang, A. (2005). OrfPredictor: predicting protein-coding  
948 regions in EST-derived sequences. *Nucleic Acid Res.* 33, W677-680. doi: 10.1093/nar/gki394
- 949  
950 Mortazavi, A., Williams, B. A., McCue, K., Schaeffer, L., and Wold, B. (2008) Mapping and  
951 quantifying mammalian transcriptomes by RNA-seq. *Nat. Methods* 5, 621-628. doi:  
952 10.1038/nmeth.1226
- 953  
954 Pauletto, M., Manousaki, T., Ferraresso, S., Babbucci, M., Tsakogiannis, A., Louro, B., et al.,  
955 (2018) Genomic analysis of *Sparus aurata* reveals the evolutionary dynamics of sex-biased genes  
956 in a sequential hermaphrodite fish. *Commun. Biol.* 1, 119. doi: 10.1038/s42003-018-0122-7
- 957  
958 Pedersen, R. A. (1971). DNA content, ribosomal gene multiplicity, and cell size in fish. *J. Exp.*  
959 *Zool.* 177, 65-79. doi: 10.1002/jez.1401770108
- 960

- 961 Pérez-Sánchez, J., Borrel, M., Bermejo-Nogales, A., Benedito-Palos, L., Saera-Vila, A., Calduch-  
962 Giner, J. A., et al., (2013). Dietary oils mediate cortisol kinetics and the hepatic expression profile  
963 of stress responsive genes in juveniles of gilthead sea bream (*Sparus aurata*) exposed to crowding  
964 stress. *Comp. Biochem. Physiol.* 8, 123-130. doi: 10.1016/j.cbd.2013.02.001  
965
- 966 Peruzzi, S., Chatain, B., and Menu, B. (2005). Flow cytometric determination of genome size in  
967 European sea bass (*Dicentrarchus labrax*), gilthead seabream (*Sparus aurata*), thinlip mullet (*Liza*  
968 *ramada*) and European eel (*Anguilla anguilla*). *Aquat. Living Resour.* 18, 77-81. doi:  
969 10.1051/alr:2005008  
970
- 971 Piazzon, M. C., Estensoro, I., Calduch-Giner, J. A., Del Pozo, R., Picard-Sánchez, A., Pérez-  
972 Sánchez, J., et al., (2018). Hints of T cell response in a fish-parasite model: *Enteromyxum leei*  
973 induces differential expression of T cell signature molecules depending on the organ and infection  
974 status. *Parasit. Vectors* 11, 443. doi: 10.1186/s13071-018-3007-1  
975
- 976 Piazzon, M. C., Mladineo, I., Naya-Català, F., Dirks, R. P., Jong-Raadsen, S., Vrbatović, A., et al.,  
977 (2019). Acting locally - affecting globally: RNA sequencing of gilthead sea bream with a mild  
978 *Sparicotyle chrysophrii* infection reveals effects on apoptosis, immune and hypoxia related genes.  
979 *BMC Genomics* 20, 200. doi: 10.1186/s12864-019-5581-9  
980
- 981 Rice, P., Longden, I., and Bleasby, A. (2000). EMBOSS: the European Molecular Biology Open  
982 Software Suite. *Trends Genet.* 16, 276-277. doi: 10.1016/S0168-9525(00)02024-2  
983
- 984 Rizzon, C., Ponger, L., and Gaut, B. S. (2006). Striking similarities in the genomic distribution of  
985 tandemly arrayed genes in Arabidopsis and rice. *PLoS comput. Biol.* 2(9), e115.  
986 doi:10.1371/journal.pcbi.0020115  
987
- 988 Rozenfeld, C., Blanca, J., Gallego, V., García-Carpintero, V., Herranz-Jusdado, J. G., Pérez, L., et  
989 al., (2019). De novo European eel transcriptome provides insights into the evolutionary history of  
990 duplicated genes in teleost lineages. *PloS one*, 14(6), e0218085.  
991 doi:10.1371/journal.pone.0218085  
992
- 993 Sánchez, J. A., López-Olmeda, J. F., Blanco-Vives, B., and Sánchez-Vázquez, F. J. (2009).  
994 Effects of feeding schedule on locomotor activity rhythms and stress response in sea bream.  
995 *Physiol. Behav.* 98, 125-129. doi: 10.1016/j.physbeh.2009.04.020  
996
- 997 Sbragaglia, V., Nuñez, J. D., Dominoni, D., Coco, S., Fanelli, E., Azzurro, E., et al., (2019).  
998 Annual rhythms of temporal niche partitioning in the Sparidae family are correlated to different  
999 environmental variables. *Sci. Rep.* 9(1), 1708. doi:10.1038/s41598-018-37954-0  
1000
- 1001 Schmieder, R., and Edwards, R. (2011). Quality control and preprocessing of metagenomic  
1002 datasets. *Bioinformatics* 27, 863-864. doi: 10.1093/bioinformatics/btr026  
1003
- 1004 Simó-Mirabet, P., Felip, A., Estensoro, I., Martos-Sitcha, J. A., de las Heras, V., Calduch-Giner, J.  
1005 A., et al., (2018). Impact of low fish meal and fish oil diets on the performance, sex steroid profile  
1006 and male-female sex reversal of gilthead sea bream (*Sparus aurata*) over a three-year production  
1007 cycle. *Aquaculture* 490, 64-74. doi: 10.1016/j.aquaculture.2018.02.025  
1008
- 1009 Skinner, M. E., Uzilov, A. V., Stein, L. D., Mungall, C. J., and Holmes, I. H. (2009). JBrowse: a  
1010 next-generation genome browser. *Genome Res.* 19, 1630-1638. doi: 10.1101/gr.094607.109

1011  
1012  
1013  
1014  
1015  
1016  
1017  
1018  
1019  
1020  
1021  
1022  
1023  
1024  
1025  
1026  
1027  
1028  
1029  
1030  
1031  
1032  
1033  
1034  
1035  
1036  
1037  
1038  
1039  
1040  
1041  
1042  
1043  
1044  
1045  
1046  
1047  
1048  
1049  
1050  
1051  
1052  
1053  
1054  
1055  
1056  
1057  
1058  
1059  
1060

Stanke, M., Diekhans, M., Baertsch, R., and Haussler, D. (2008). Using native and syntenically mapped cDNA alignments to improve *de novo* gene finding. *Bioinformatics* 24, 637-644. doi: 10.1093/bioinformatics/btn013

Stein, C., Caccamo, M., Laird, G., and Leptin, M. C. (2007). Conservation and divergence of gene families encoding components of innate immune response systems in zebrafish. *Genome Biol.* 8, R251. doi: 10.1186/gb-2007-8-11-r251

Sun, H., Ding, J., Piednoël, M., and Schneeberger, K. (2018). findGSE: estimating genome size variation within human and *Arabidopsis* using k-mer frequencies. *Bioinformatics* 34, 550-557. doi: 10.1093/bioinformatics/btx637

Tine, M., Kuhl, H., Gagnaire, P. A., Louro, B., Desmarais, E., Martins, R. S. T., et al., (2014). European sea bass genome and its variation provide insights into adaptation to euryhalinity and speciation. *Nat. Commun.* 5, 5770. doi: 10.1038/ncomms6770

Trapnell, C., Roberts, A., Goff, L., Pertea, G., Kim, D., Kelley, D. R., et al., Differential gene and transcript expression analysis of RNA-seq experiments with TopHat and Cufflinks. *Nat. Protoc.* 7, 562-578. doi: 10.1038/nprot.2012.016

Van der Aa, L. M., Levraud, J. P., Yahmi, M., Lauret, E., Briolat, V., Herbomel, P., et al., (2009). A large new subset of TRIM genes highly diversified by duplication and positive selection in teleost fish. *BMC Biology* 7, 7. doi:10.1186/1741-7007-7-7

Wallace, I. M., O'Sullivan, O., Higgins, D. G., and Notredame, C. (2006). M-Coffee: combining multiple sequence alignment methods with T-Coffee. *Nucleic Acids Res.* 34, 1692-1699. doi: 10.1093/nar/gkl091

Warren, W. C, García-Pérez, R., Xu, S., Lampert, K. P., Chalopin, D., Stöck, M., et al., (2018). Clonal polymorphism and high heterozygosity in the celibate genome of the Amazon molly. *Nat. Ecol. Evol.* 2, 669-679. doi: 10.1038/s41559-018-0473-y

Wehe, A., Bansal, M. S., Burleigh, J. G., and Eulenstein, O. (2008). DupTree: a program for large-scale phylogenetic analyses using gene tree parsimony. *Bioinformatics* 24, 1540-1541. doi: 10.1093/bioinformatics/btn230

Xu, Z., and Wang, H. (2007). LTR\_FINDER: an efficient tool for the prediction of full-length LTR retrotransposons. *Nucleic Acids Res.* 35, W265-W268. doi: 10.1093/nar/gkm286

Xue, W., Li, J. T., Zhu, Y. P., Hou, G. Y., Kong, X. F., Kuang, Y. Y., et al., (2013). L\_RNA\_scaffolder: scaffolding genomes with transcripts. *BMC Genomics* 14, 604. doi: 10.1186/1471-2164-14-604

Yuan, Z., Liu, S., Zhou, T., Tian, C., Bao, L., Dunham, R., et al., (2018). Comparative genome analysis of 52 fish species suggests differential associations of repetitive elements with their living aquatic environments. *BMC Genomics* 19, 141. doi: 10.1186/s12864-018-4516-1

Yúfera, M., Perera, E., Mata-Sotres, J. A., Calduch-Giner, J., Martínez-Rodríguez, G., and Pérez-Sánchez, J. (2017). The circadian transcriptome of marine fish *Sparus aurata* larvae reveals highly

1061 synchronized biological processes at the whole organism level. *Sci. Rep.* 7, 12943. doi:  
1062 10.1038/s41598-017-13514-w

1063  
1064 Zohar, Y., Abraham, M., and Gordin, H. (1978). The gonadal cycle of the captivity-reared  
1065 hermaphroditic teleost *Sparus aurata* (L.) during the first two years of life. *Ann. Biol. Anim.*  
1066 *Biochem. Biophys.* 18, 877-882. doi: 10.1051/rnd:19780519

1067

## 1068 **Figures**

1069 **Figure 1. Workflow of the gilthead sea bream genome assembly project.** Black boxes with  
1070 white text indicate generated genomic resources, according to the following steps: experimental  
1071 procedures & sequencing, genome assembly & super-scaffolding, and post-assembly analyses  
1072 over the genome draft (*ab initio* gene prediction, synteny analysis, phylogenomics).

1073  
1074 **Figure 2. Scaffold unique descriptions distribution and gene features.** (A) Cumulative  
1075 distribution of non-redundant gene annotations among length-ordered scaffolds. (B) Summary  
1076 statistics of gene annotation in the gilthead sea bream genome.

1077  
1078 **Figure 3. Chimeric genes functional annotation and gene ontology enrichment.** (A) Gene  
1079 Ontology (GO) functional annotation analysis over the whole gene model, showing the major GO  
1080 biological processes (red), GO molecular functions (blue) and GO cellular components (green) for  
1081 genes found in the gilthead sea bream genome. (B) Pie diagram representing the percentage of  
1082 biological process-enriched GO term functional categories. (C) Venn diagram representing the  
1083 overlapping of the unique gene descriptions between main functional categories.

1084  
1085 **Figure 4. Gene homology and phylogeny of gilthead sea bream.** (A) Circos plots representing  
1086 homology relations between gilthead sea bream and other fish species genes. Relations between  
1087 scaffolded genes with other species with a 99% of identity are shown. Duplicated genes relations  
1088 between gilthead sea bream chromosomes are represented by inner lines. (B) Species tree obtained  
1089 from the concatenation of 148 single-copy widespread proteins. All nodes are maximally  
1090 supported (1 aLRT). Number on the branches mark the duplication densities (average number of  
1091 duplication per gene and per lineage) for gilthead sea bream genes in the lineages leading to this  
1092 species with (green) or without (blue) expansions.

1093

1094 **Figure 5. Tissue expression signatures.** (A) Venn diagram showing the overlap between the  
1095 gene expression signatures in all analyzed tissues. (B) Venn diagram showing the overlap between  
1096 unique gene annotation expression signatures in all analyzed tissues. Homology-based annotation  
1097 was done according to the gilthead sea bream transcriptome (Pauletto et al., 2018) and NCBI non-  
1098 redundant (Nr) database. (C) Percentage of duplicated genes among tissues or groups of tissues  
1099 (blue columns). Red line represents the duplication rate of the unique gene annotations present in a  
1100 tissue or in a group of tissues.

1101

1102 **Figure 6. Comparison of tissue-exclusive paralogs and gene expression Atlas in animal**  
1103 **models.** (A) Classification of tissue-exclusive paralog expression enrichment in animal models  
1104 according to gene expression atlases: enriched in tissue (checkered stacked bar), enriched in tissue  
1105 and/or other tissues (diagonal stripped stacked bar) and expressed in all tissues (smooth colored  
1106 column). (B) Scatter plot showing the range of expression variation in tissue-exclusive paralogs.  
1107 Each point represents the variation value for each paralog between the most and the less expressed  
1108 copies.

## Supplementary Figures

### **Supplementary Figure 1. K-mer based genome estimation size and scaffold distribution. (A)**

63-mer frequency histogram for the gilthead sea bream assembly for genome size estimation. **(B)**

Cumulative length of the assembled scaffolds fitted to total scaffold length. Highlighted points remark the number of scaffolds compressed under 25, 50, 75 and 90% of the total scaffold length.

### **Supplementary Figure 2. Reconstructed gilthead sea bream super-scaffolds.**

All scaffolds (1.87-12.05 Mb) were anchored to the gilthead sea bream chromosomes ( $2n=48$ ). Scaffolds are listed at the right side of each super-scaffold, and a nucleotide position of reference for the browser is marked in the left side. A genome browser to access and navigate the super-scaffold is available at <http://nutrigrp.iats.org/seabreambrowser>.

### **Supplementary Figure 3. MGEs and chimeric genes KRONA representation.**

KRONA representation of the distribution of all MGEs and chimeric genes belonging to the mobilome draft of the gilthead sea bream excluding low complexity repeats and introns.

## Supplementary Tables

### **Supplementary Table 1. Forward and reverse primers used for real-time qPCR.**

**Supplementary Table 2. Summary statistics of sequencing data, detailed for each sequencing strategy.**



1133 **Supplementary Table 3. Assembly metrics for the gilthead sea bream genome.** Metrics were  
1134 inferred using the script `assemblathon_stats.pl` available at  
1135 [http://korflab.ucdavis.edu/datasets/Assemblathon/Assemblathon2/Basic\\_metrics/assemblathon\\_stats.pl](http://korflab.ucdavis.edu/datasets/Assemblathon/Assemblathon2/Basic_metrics/assemblathon_stats.pl).  
1136

1137  
1138 **Supplementary Table 4. Dedupe redundancy analysis with nucleotide sequences.** Analysis  
1139 was performed over the nucleotide sequences of the final set of active transcripts retrieved from  
1140 RNA-seq transcriptome analysis.

1141  
1142 **Supplementary Table 5. MGEs and chimeric related-genes found in the mobilome draft of**  
1143 **gilthead sea bream genome.**

1144  
1145 **Supplementary Table 6. Predicted and annotated non coding RNAs in the gilthead sea**  
1146 **bream genome.**

1147  
1148 **Supplementary Table 7. Summary of annotations of chimeric/composite genes and**  
1149 **multigene families of the gilthead sea bream genome including BLAST hits and statistics of**  
1150 **those presenting homology to MGEs.**

1151  
1152 **Supplementary Table 8. Biological process GO term enrichment results in transposon-**  
1153 **overlapping gene fraction.** Supplementary Table shows the GO annotation of the 108 non-  
1154 redundant descriptions corresponding to chimeric/composite genes.

1155  
1156 **Supplementary Table 9. Synteny results between gilthead sea bream and related species.**  
1157

1158 **Supplementary Table 10. Tissue-exclusive genes dataset.** Homology-based annotation was  
1159 done according to the gilthead sea bream transcriptome and NCBI non-redundant (Nr) database,  
1160 and the correspondent Uniprot KB AC/ID was retrieved for each gene. The number of copies is  
1161 shown in Copy number column.

1162  
1163 **Supplementary Table 11. Tissue-exclusive duplicated gene list.** Results highlights tissue-  
1164 expression pattern in other animal models: enriched in tissue (red), enriched in tissue and/or other  
1165 tissues (green), expressed in all tissue (blue) and unclassified (uncolored). A range of colors is  
1166 shown for the  $\Delta_{\text{copies}}$  between paralog sets ordered by each category. Column Corrected P-val  
1167 shows the result for the ANOVA (FDR < 0.05) test.

1168  
1169 **Supplementary Table 12. Pearson correlation coefficients between RNA-seq and real-time**  
1170 **qPCR expression values of tissue-exclusive genes.** AI-PI: Anterior & Posterior intestine; WSM:  
1171 White skeletal muscle; L: Liver; S: Spleen; G: Gills. PCC: Pearson correlation coefficient. <sup>1</sup>P-  
1172 value obtained in Pearson correlation.

1173  
1174

## Experimental procedures & sequencing strategy

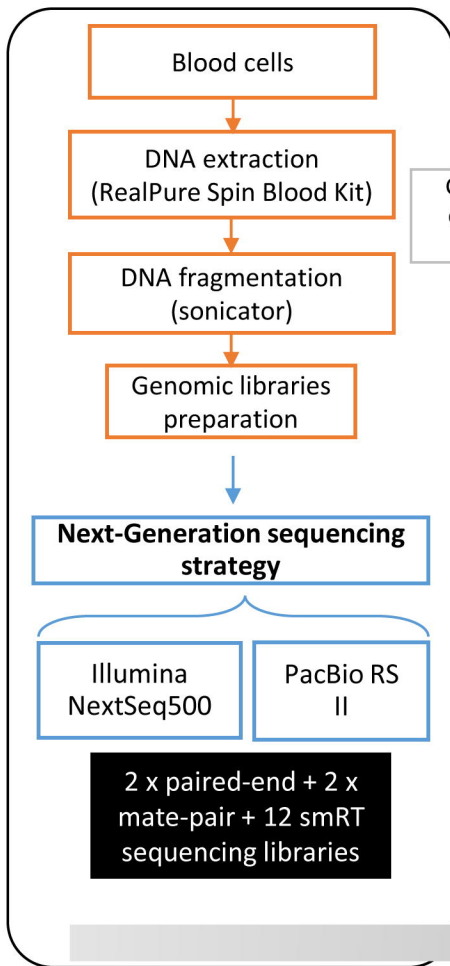

## Genome assembly & super-scaffolding

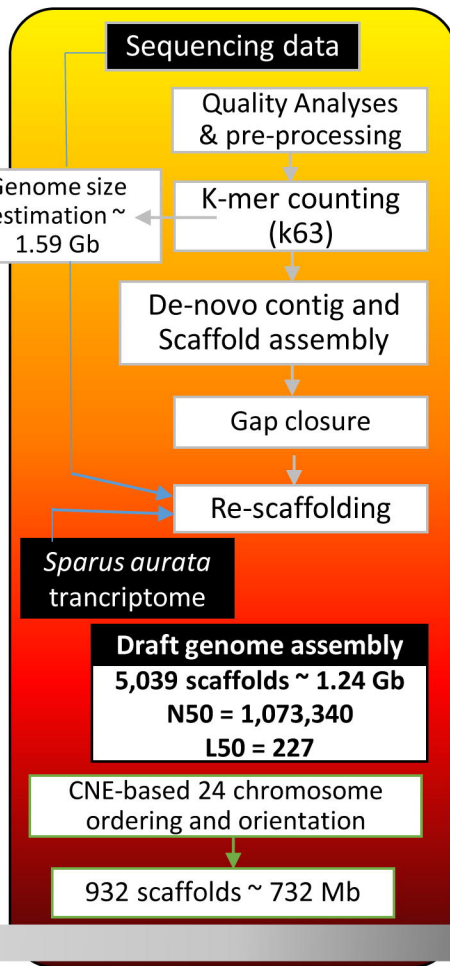

## Post-assembly genomic studies

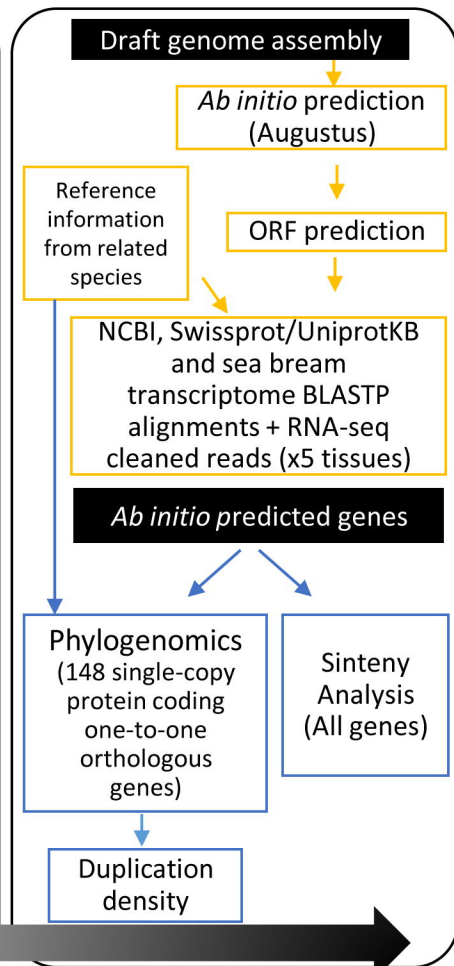

A

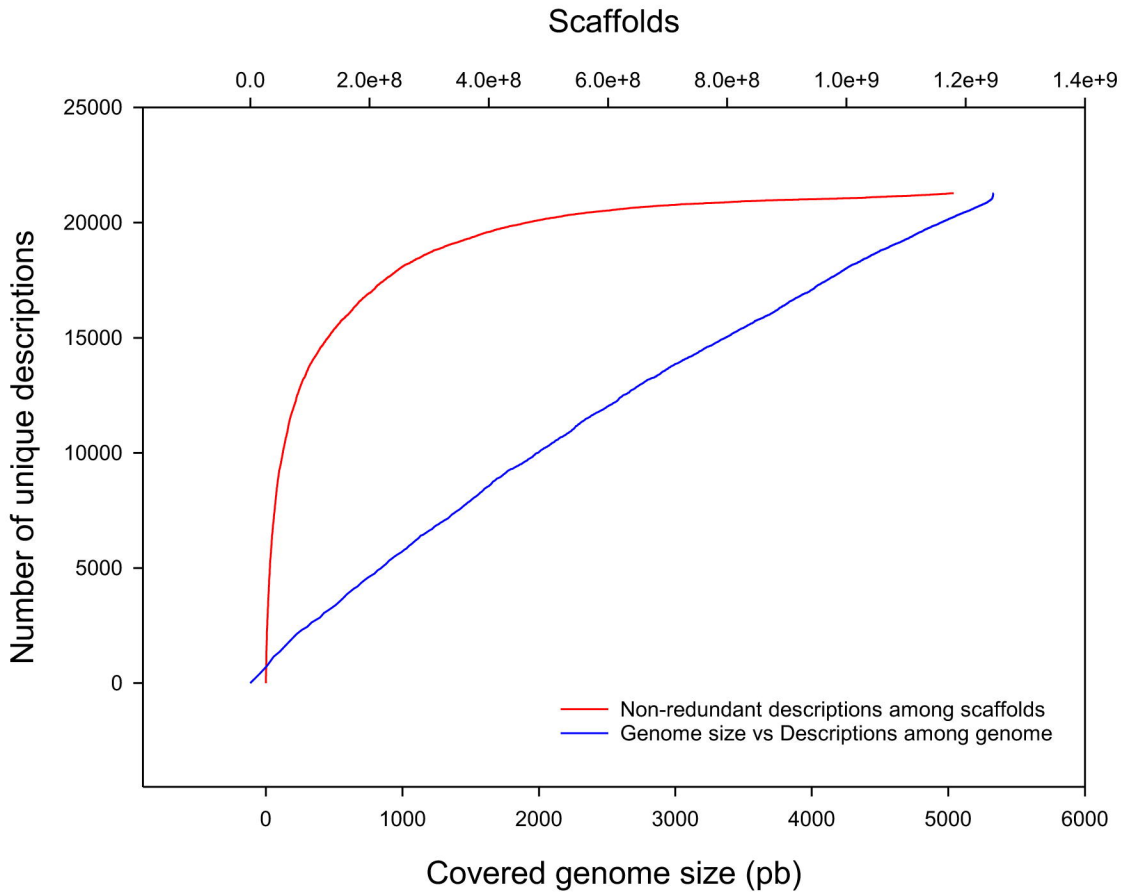

B

|                                                             | Total assembly | Super-scaffolding |
|-------------------------------------------------------------|----------------|-------------------|
| Genome length (Mbases)                                      | 1,246,531,774  | 732,670,891       |
| Number of scaffolds                                         | 5,039          | 932               |
| Size range (min-max)                                        | 765-16,075,163 | 1,868-12,047,293  |
| Number of predicted coding regions (CDS)                    | 55,423         | 30,455            |
| Avg. length of CDS (bp)                                     | 10,134         | 11,756            |
| Unique descriptions                                         | 21,275         | 16,046            |
| Average gene size (bp)                                      | 10,134         | 11,756            |
| Number of coding exons                                      | 364,433        | 208,299           |
| Number of introns                                           | 306,674        | 178,167           |
| Avg. length of coding exons                                 | 184.18         | 173.75            |
| Avg. length of introns                                      | 1,751          | 1,806             |
| Total intron-associated bases (Mb)                          | 598            | 358               |
| Gene density (genes/Kbase)                                  | 0.048          | 0.042             |
| Annotation-based duplication rate (CDS/Unique descriptions) | 2.43           | 1.90              |
| Avg. length of proteins                                     | 375            | 396               |
| Exons/transcript (excludes single-exon genes)               | 5.95           | 6.70              |
| Introns/transcript (excludes single-exon genes)             | 5.14           | 5.84              |

A

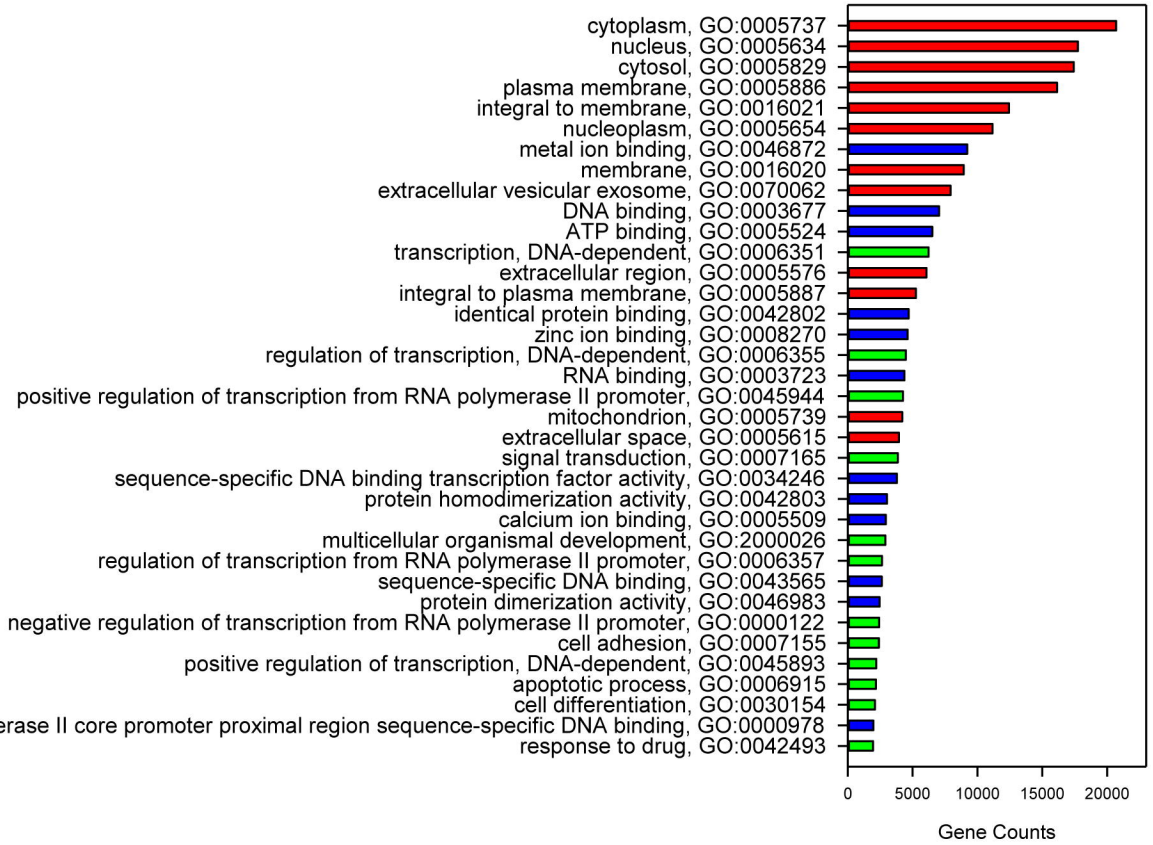

B

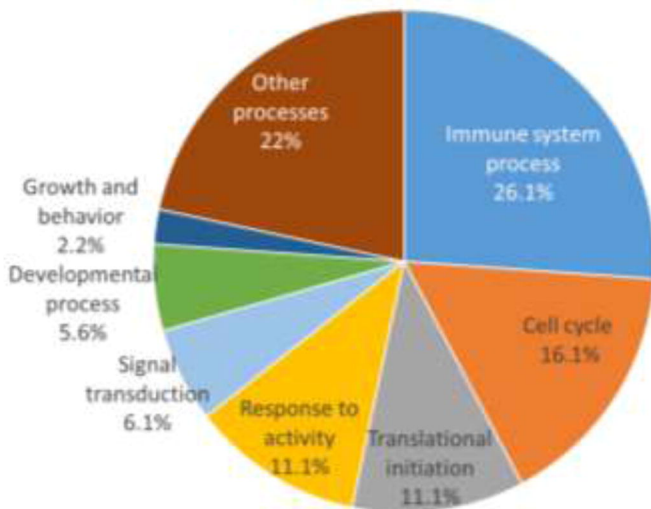

C

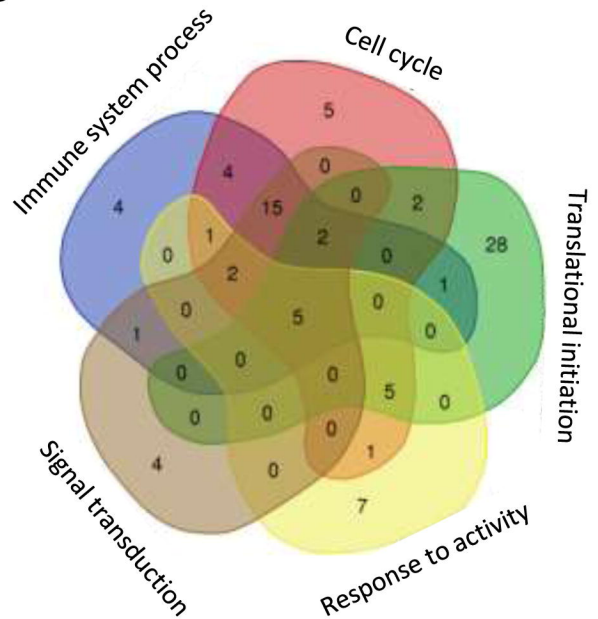

A

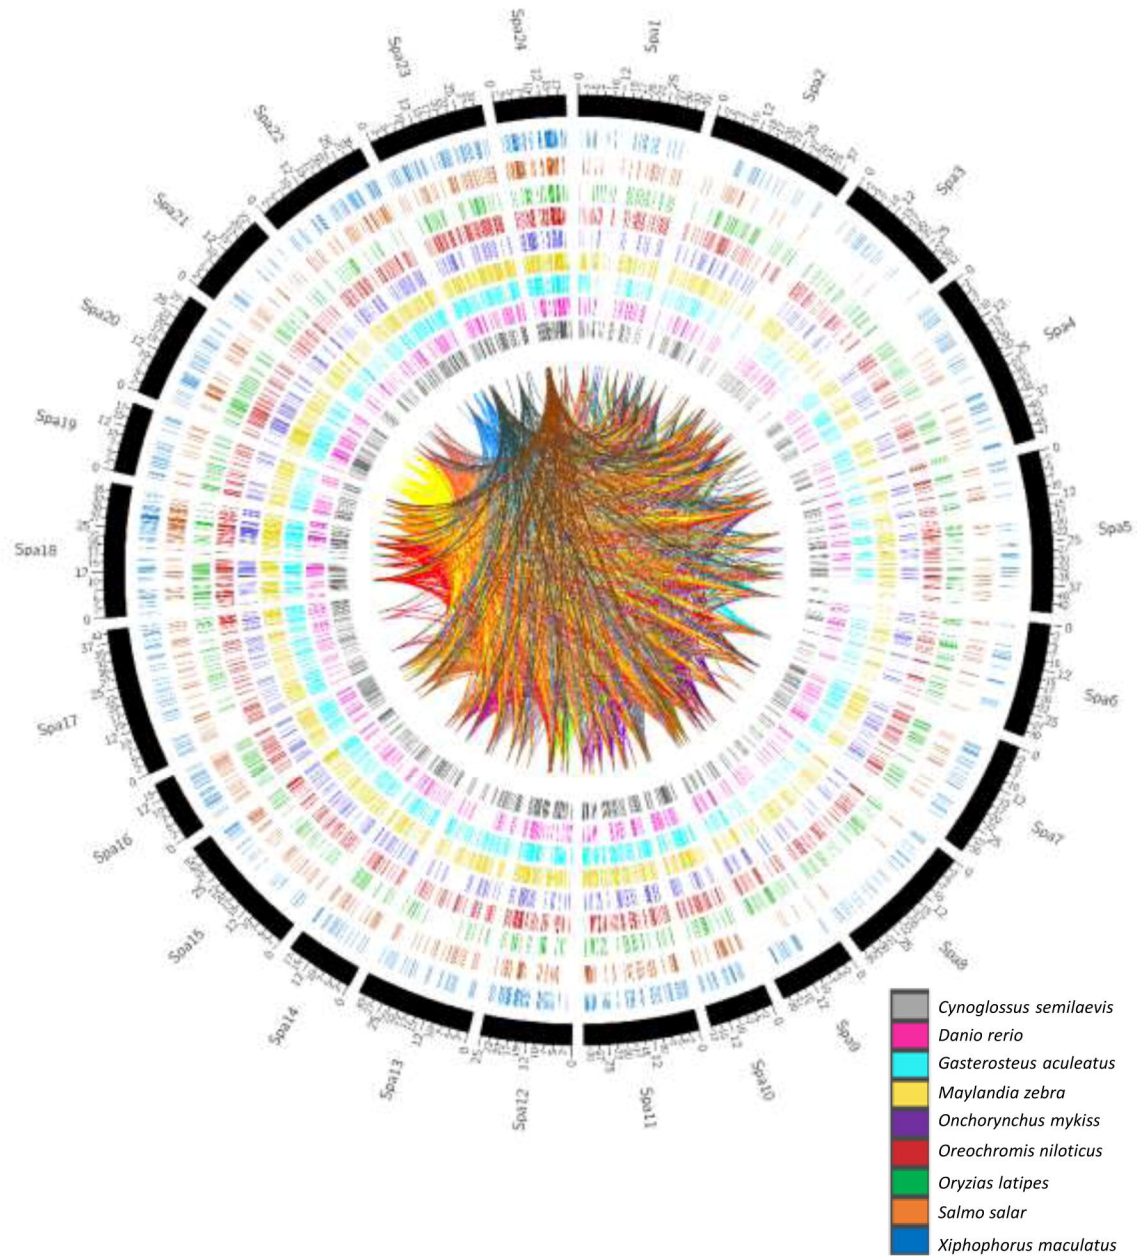

B

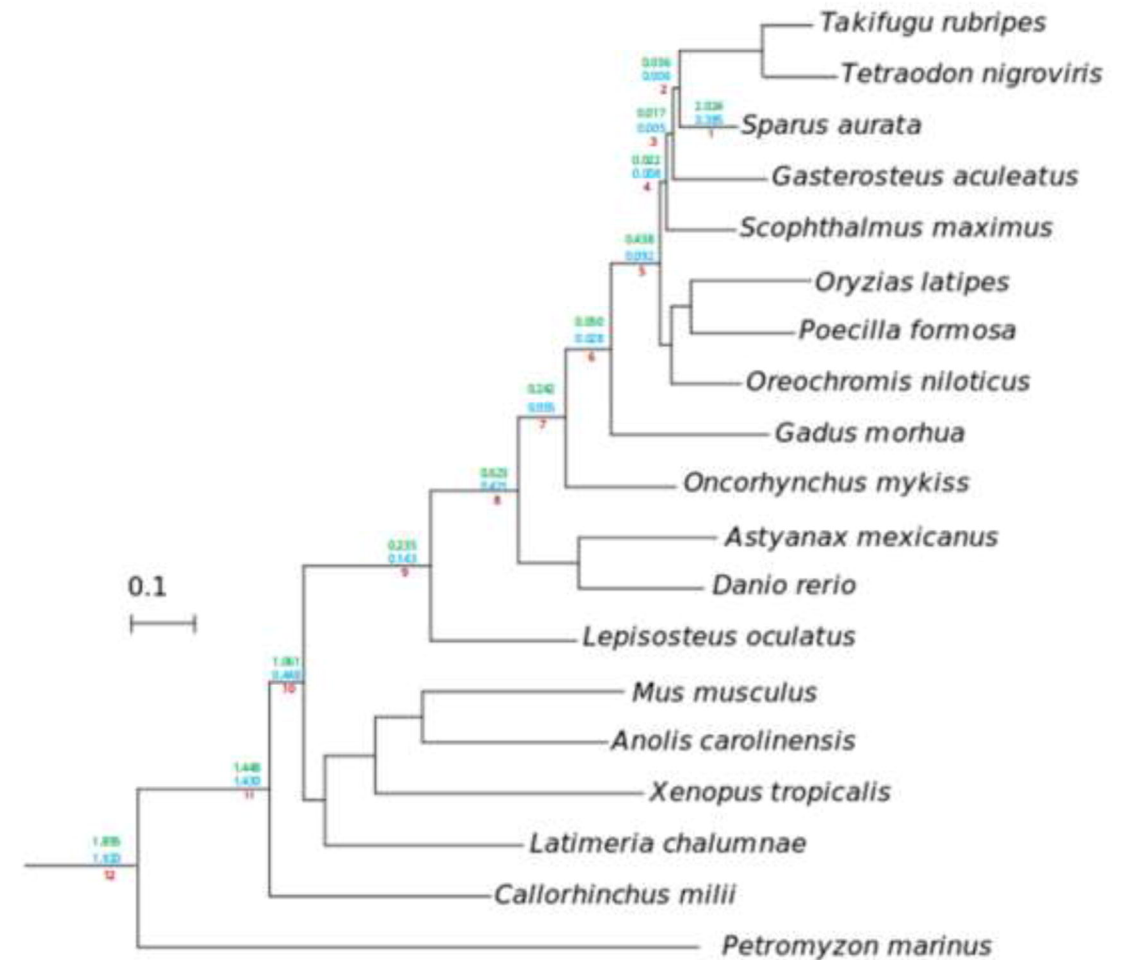

A

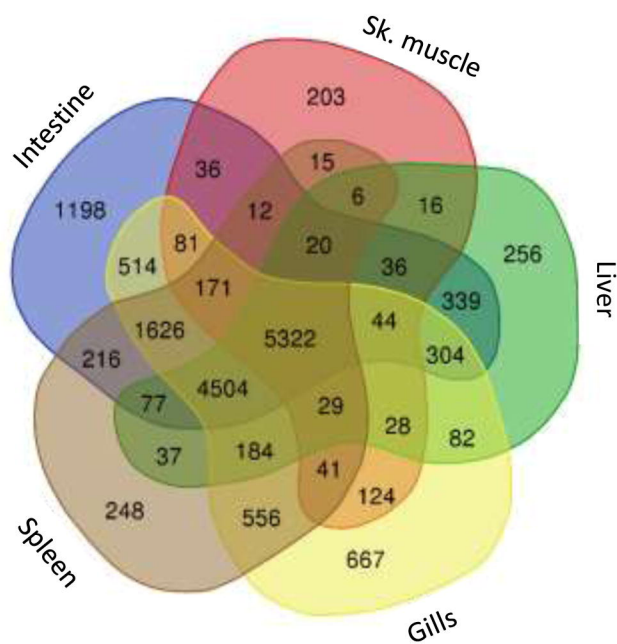

B

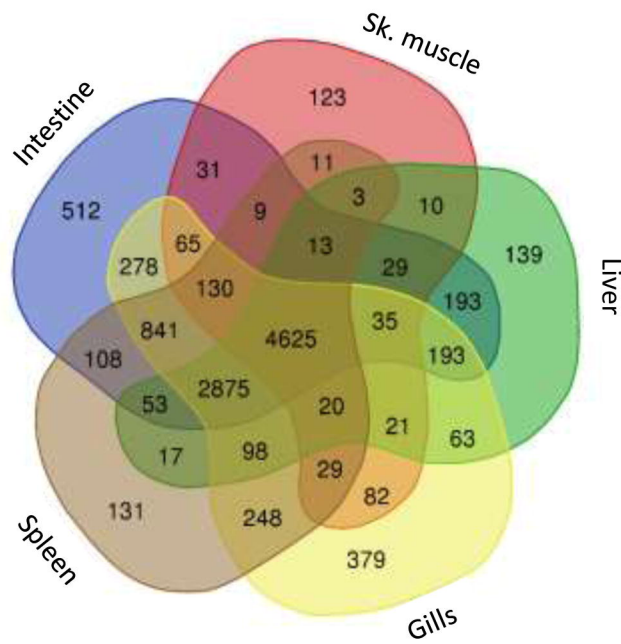

C

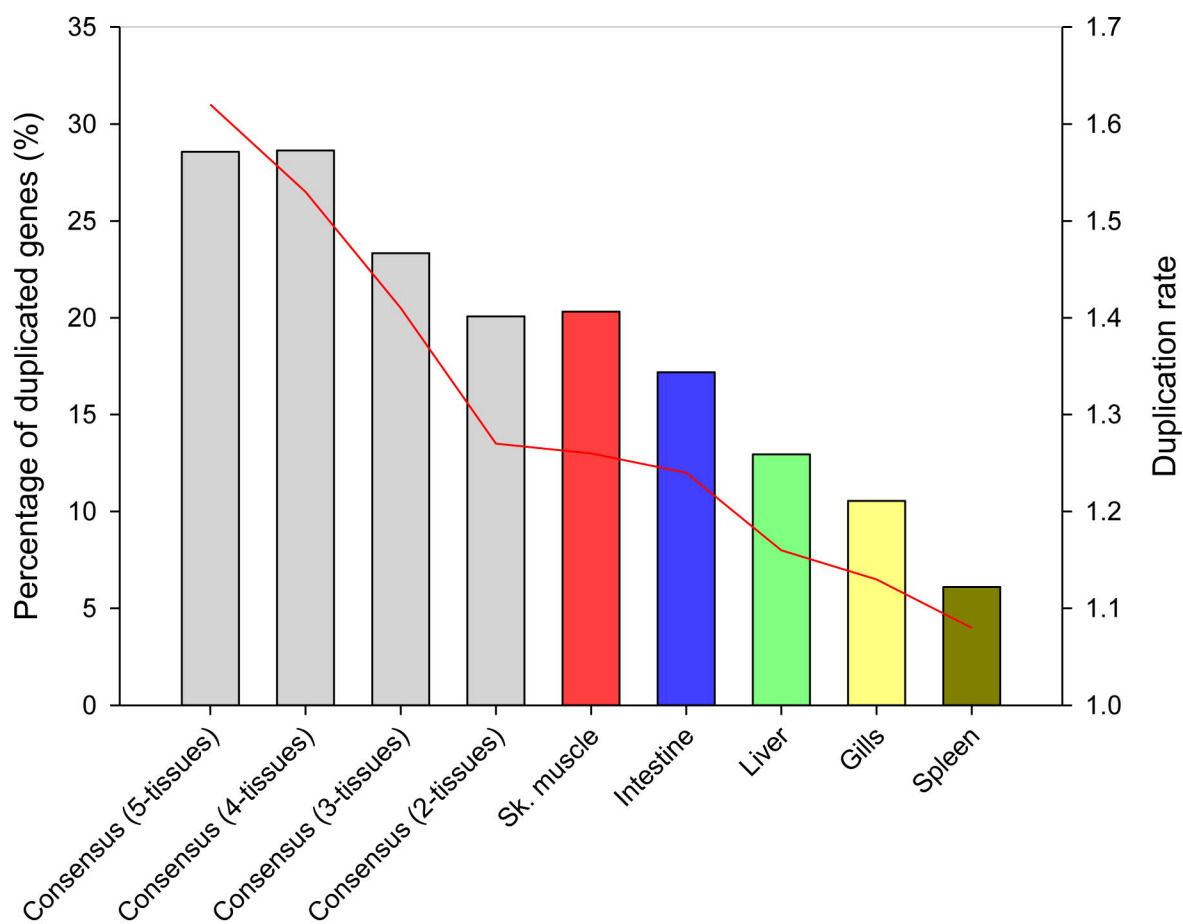

A

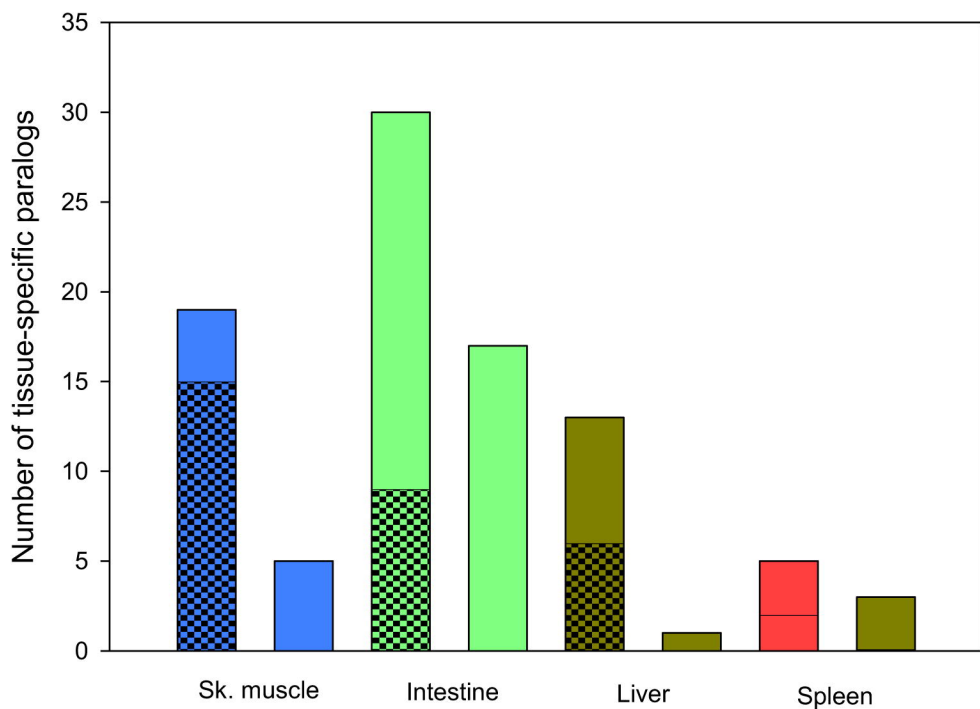

B

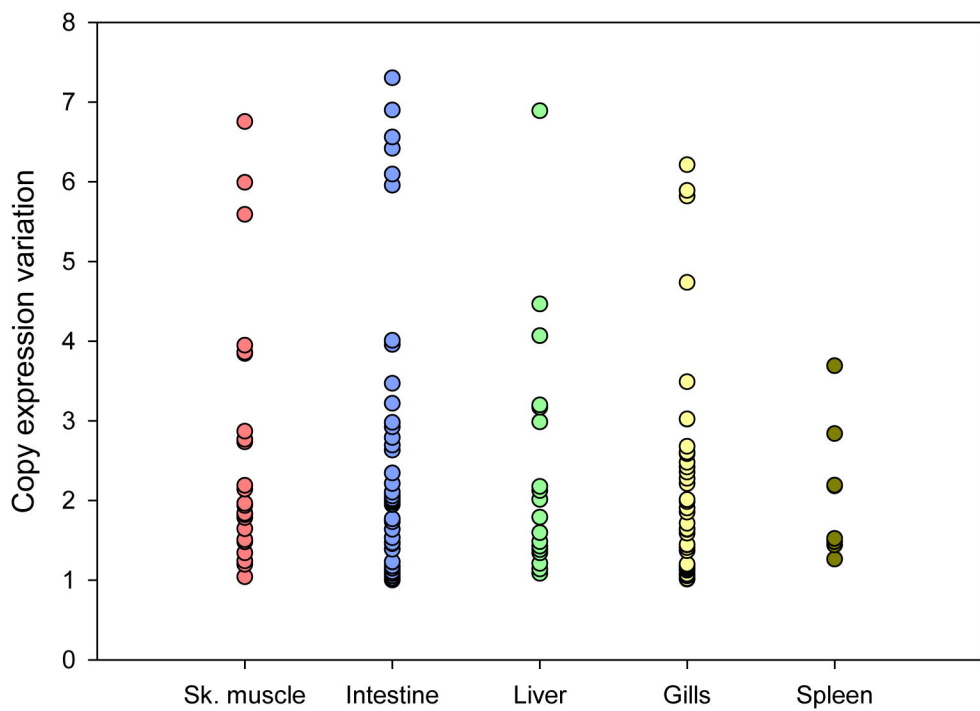

Source: https://www.biorxiv.org/content/10.1101/769240v1.full.pdf
